# **Kinetic Properties of Microbial Exoenzymes Vary with Soil Depth but Have Similar Temperature Sensitivities Through the Soil Profile**

Ricardo J. Eloy Alves<sup>1\*</sup>, Ileana A. Callejas<sup>1,2</sup>, Gianna L. Marschmann<sup>1</sup>, Maria Mooshammer<sup>3</sup>, Hans W. Singh<sup>1,4†</sup>, Bizuayehu Whitney<sup>1,5†</sup>, Margaret S. Torn<sup>1,6</sup>, Eoin L. Brodie<sup>1,3\*</sup>

<sup>1</sup> Climate and Ecosystem Sciences Division, Lawrence Berkeley National Laboratory, Berkeley, CA, USA

<sup>2</sup> Department of Civil and Environmental Engineering, University of California Los Angeles, Los Angeles, CA, USA

<sup>3</sup> Department of Environmental Science, Policy, and Management, University of California Berkeley, Berkeley, CA, USA

<sup>4</sup> Department of Molecular and Cell Biology, University of California Berkeley, Berkeley, CA, USA

<sup>5</sup> Department of Plant and Microbial Biology, University of California Berkeley, Berkeley, CA, USA

<sup>6</sup> Energy Resources Group, University of California Berkeley, Berkeley, CA, USA

\* Correspondence: Ricardo J. Eloy Alves, [rjealves@lbl.gov](mailto:rjealves@lbl.gov); Eoin L. Brodie, [elbrodie@lbl.gov](mailto:elbrodie@lbl.gov)

†Present address: Hans W. Singh, Center for Marine Biotechnology and Biomedicine, Scripps Institution of Oceanography, University of California San Diego, La Jolla, CA, USA; Bizuayehu Whitney, Khoury College of Computer Sciences, Northeastern University, Boston, MA, USA

Keywords: extracellular enzymes, soil, subsoil, enzyme kinetics, temperature sensitivity, Michaelis-Menten, Arrhenius, Macromolecular Rate Theory

## Abstract

Current knowledge of the mechanisms and responses of soil organic matter (SOM) turnover to warming is mainly limited to surface soils, although over 50% of global soil carbon is contained in subsoils. Deep soils have different physicochemical properties, nutrient inputs and microbiomes, which may harbor distinct functional traits and lead to different SOM dynamics and temperature responses. We hypothesized that kinetic and thermal properties of microbial exoenzymes, which mediate SOM depolymerization, vary with soil depth, reflecting microbial adaptation to distinct substrate and temperature regimes. We determined the Michaelis-Menten (MM) kinetics of three ubiquitous enzymes involved in carbon (C), nitrogen (N) and phosphorus (P) acquisition at six soil depths down to 90 cm at a temperate coniferous forest, and their temperature sensitivity based on Arrhenius and Macromolecular Rate Theory (MMRT) models over six temperatures between 4-50°C. Maximal enzyme velocity ( $V_{\max}$ ) decreased strongly with depth for all enzymes, both on a dry soil mass and a microbial biomass C basis, whereas their affinities increased, indicating adaptation to lower substrate availability. Surprisingly, microbial biomass-specific catalytic efficiencies also decreased with depth, except for the P-acquiring enzyme, indicating distinct nutrient demands at depth relative to microbial abundance. These results indicated that deep soil microbiomes encode enzymes with intrinsically lower turnover and/or produce less enzymes per cell, likely reflecting distinct life strategies. The relative kinetics between different enzymes also varied with depth, suggesting an increase in relative P demand with depth, or that phosphatases may be involved in C acquisition. Warming consistently led to increased  $V_{\max}$  and catalytic efficiency of all enzymes, and thus to overall higher SOM-decomposition potential, but enzyme temperature sensitivity was similar through the soil profile based on both Arrhenius/ $Q_{10}$  and MMRT models. Nevertheless, temperature directly affected the kinetic properties of different enzyme types in a depth-dependent manner, and thus the relative depolymerization potential of different compounds. Our results indicate that kinetic and thermal properties of exoenzymes are intrinsic traits of soil microbiomes adapted to distinct physicochemical conditions associated with different soil depths, and improve our conceptual understanding of critical mechanisms underlying SOM dynamics and responses to warming through the soil profile.

## Introduction

Soils are estimated to contain ~3,000 Gt carbon (C), which is more than all C in the atmosphere and in living biomass combined (Köchy et al., 2015). The dynamics of the large soil C reservoir is sensitive to climate change, and C losses as carbon dioxide (CO<sub>2</sub>) are expected to become a major positive feedback to global warming through increased soil organic matter (SOM) decomposition (Crowther et al., 2016; Van Gestel et al., 2018). An estimated  $55 \pm 50$  Gt C may be lost globally from just 1°C warming of the upper 10 cm of soil alone (Crowther et al., 2016). While current model predictions of C dynamics and responses to climate change are largely based on surface soils (Crowther et al., 2016; Trumbore, 2009; Van Gestel et al., 2018), soils below 20 cm

contain up to 50% of the global soil C budget within the top 1 m of soil (Balesdent et al., 2018; Jobbágy and Jackson, 2000). These subsoils are predicted to warm at rates similar to those of surface soils (Soong et al., 2020), and recent *in situ* deep soil warming experiments have shown uniform warming responses down to 100-120 cm depth leading to soil C losses at least three times higher than those estimated based on surface soils alone (Hanson et al., 2020; Hicks Pries et al., 2017; Nottingham et al., 2020; Soong et al., 2021). Despite these observations, relatively little is known about the microbial mechanisms and interactions mediating SOM turnover and CO<sub>2</sub> emissions, and their responses to environmental changes in subsoils (Gross and Harrison, 2019; Rumpel and Kögel-Knabner, 2011), which are essential to improve predictions of SOM dynamics in response to warming.

Soil physicochemical properties and environmental conditions, such as nutrient inputs, temperature, moisture, mineralogy, and organic matter composition vary markedly with depth, creating distinct environments for the microbial processes that mediate SOM transformations (Blume et al., 2002; Fierer et al., 2003a; Jones et al., 2018; Rumpel and Kögel-Knabner, 2011; Salomé et al., 2010; Trumbore, 2000). The rate-limiting steps in SOM decomposition are primarily catalyzed by microbial exoenzymes, which depolymerize plant and microbial residues into lower molecular weight compounds that are assimilated by both plants and microbes (Burns et al., 2013; Davidson and Janssens, 2006). The kinetic and thermal properties of exoenzymes are therefore fundamental determinants of SOM turnover, nutrient availability, soil C stability, and greenhouse gas emissions, as well as their responses to environmental changes (Chen et al., 2018; Davidson and Janssens, 2006; Sinsabaugh and Shah, 2012; Wallenstein et al., 2011). In addition to the large diversity of exoenzymes targeting different organic compounds, evolutionarily distinct exoenzymes that catalyze the same reactions (i.e., isozymes) can vary widely in their kinetic properties, namely their maximal substrate turnover ( $K_{cat}$ ) and related maximal reaction velocity ( $V_{max}$ ), their Michaelis constant ( $K_m$ ), which is inversely proportional to their affinity, and their catalytic efficiency ( $K_{cat}/K_m$ ) (Khalili et al., 2011; Nannipieri et al., 2012; Sinsabaugh and Shah, 2012; Tischer et al., 2015). These properties constitute microbial evolutionary adaptations and trade-offs related to resource supply and demand, associated with distinct ecological niches (Allison et al., 2011; Ho et al., 2017; Malik et al., 2020; Sinsabaugh and Shah, 2012). Temperature is also a major factor controlling microbial community assembly, growth and functionality (Allison and Treseder, 2008; Bradford, 2013; Cavicchioli et al., 2019; Lax et al., 2020), and warming has been shown to change the abundance of diverse taxa and functional groups through the soil profile (Dove et al., 2021; Jiang et al., 2020). Moreover, optimal enzyme temperatures are broadly correlated with the optimal growth temperatures of their organisms, as well as with the frequency of specific metabolic pathways, reflecting a concerted evolutionary adaptation to temperature and associated selective pressures (Engqvist, 2018; Somero, 2004). Therefore, variation in substrate and temperature regimes through the soil profile is likely to select for microbiomes producing enzymes with distinct kinetic and thermal properties, which may impose depth-dependent constraints on SOM turnover and responses to warming (Allison and Treseder, 2008; Carrillo et al., 2018; Cavicchioli et al., 2019; Isobe et al., 2019; Nunan et al., 2020; Xu et

al., 2021). Microbial community composition and functional potential have indeed been shown to vary strongly with soil depth, reflecting selective adaptation to distinct niches (Blume et al., 2002; Brewer et al., 2019; Diamond et al., 2019; Dove et al., 2021; Eilers et al., 2012; Fierer et al., 2003b; Hansel et al., 2008; Hartmann et al., 2009; Jiao et al., 2018; Liu et al., 2019; Turner et al., 2017; Yan et al., 2019; Zosso et al., 2021). At the same time, exoenzyme activities in nature are dependent on multiple factors that can directly or indirectly modulate their kinetics, thermodynamics, and expression, beyond the intrinsic traits of the microbiome and the enzymes they encode. In particular, microbe-plant interactions, soil properties, and environmental conditions all affect enzyme expression, turnover, mobility, and substrate accessibility (Bradford, 2013; Burns et al., 2013; Davidson and Janssens, 2006; Tang and Riley, 2019; Wallenstein et al., 2011). Consequently, the effective kinetics of mixed exoenzyme pools in complex environments are emergent properties that reflect not only the summation of traits from distinct isozymes and organisms, but also direct and indirect interactions between enzymes and the environment (Burns et al., 2013; Davidson and Janssens, 2006; Sinsabaugh and Shah, 2012).

Soil exoenzyme activities and their environmental controls have been extensively studied in the context of warming and other environmental changes, as indicators of SOM decomposition activity and nutrient availability, but have largely focused on one kinetic property (i.e.,  $V_{\max}$ ) and on surface soils (Allison et al., 2011; Burns et al., 2013; Sinsabaugh and Shah, 2012). Given their critical role in soil C stability and CO<sub>2</sub> emissions, several efforts have been made to integrate kinetic and thermal properties of exoenzymes to improve the mechanistic understanding of SOM dynamics in response to warming (Allison et al., 2018; Alster et al., 2016a, 2020; Burns et al., 2013; German et al., 2012; Loepmann et al., 2016a; Razavi et al., 2015, 2016; Wallenstein et al., 2011). Several studies have investigated exoenzyme activities through the soil profile (Darby et al., 2020; Dove et al., 2020; Gelsomino and Azzellino, 2011; Jing et al., 2017; Kramer et al., 2013; Loepmann et al., 2016a; Schneckner et al., 2014, 2015; Stone et al., 2014; Taylor et al., 2002; Venkatesan and Senthurpandian, 2006). However, nearly all depth-resolved soil studies, possibly with just one exception (Loepmann et al., 2016a), have relied on potential enzyme activity assays based on single substrate concentrations, and have not experimentally determined the Michaelis-Menten (MM) kinetics required to estimate the true enzyme  $V_{\max}$ , as well as  $K_m$  and catalytic efficiency (in the context of mixed enzyme pools and complex environments; Wallenstein et al., 2011). Moreover, the temperature sensitivity of soil exoenzymes over the whole soil profile has rarely been characterized (Steinweg et al., 2013), and studies that determined both the MM kinetics of exoenzymes and their direct temperature sensitivity are scarce, even for surface soils (Allison et al., 2018; Razavi et al., 2015, 2016).

The temperature sensitivity of soil exoenzymes and other biogeochemical processes has been typically determined based on the linear Arrhenius model and related  $Q_{10}$  coefficient, which represents a simple empirical metric expressing variation in activity rates at every 10°C change in temperature (Alster et al., 2020). However, it has been argued that the  $Q_{10}$  coefficient may not reliably represent soil biological processes, as it lacks a biological and mechanistic basis, and does not capture the unimodality of typical enzyme reactions (Alster et al., 2020; Hobbs et al., 2013).

These caveats possibly explain the frequent inability of  $Q_{10}$  values to describe observed temperature responses of soil biological processes, and lack of comparability between studies (Alster et al., 2020). Macromolecular Rate Theory (MMRT) has been recently proposed as a more realistic model of enzyme temperature sensitivity based on thermodynamics and the change in heat capacity associated with enzyme catalysis, which accounts for declines in enzyme activity below thermal denaturation temperatures (Hobbs et al., 2013). MMRT can thus appropriately capture the unimodal behavior of enzyme response to temperature, and describes temperature sensitivity as comprising three fundamental components: temperature optimum ( $T_{opt}$ ), the temperature at which reaction rates are maximal; point of maximum temperature sensitivity ( $TS_{max}$ ), the temperature at which reaction rates change the most; and change in heat capacity ( $\Delta C_p^\ddagger$ ), which describes the degree of curvature of the parabolic response of reaction rates to temperature (Alster et al., 2020). A limited number of studies have applied MMRT to soil biological activities, including exoenzymes in soils and cultures of soil microbes, where it could describe temperature responses more coherently than Arrhenius models and provide more realistic interpretations of temperature sensitivity (Alster et al., 2016a, 2016b, 2018; Robinson et al., 2017; Schipper et al., 2014). However, to our knowledge, MMRT has never been used to investigate the temperature sensitivity of exoenzymes over the whole soil profile.

Different soil models have been developed to represent exoenzyme kinetics, thermodynamics, ecological stoichiometry, enzyme diffusion, and interactions with environmental factors (German et al., 2012; Sinsabaugh and Shah, 2012; Sulman et al., 2014; Tang and Riley, 2015, 2019; Wang et al., 2015; Wang and Allison, 2019; Wieder et al., 2014). However, these processes have only recently started to be incorporated into depth-resolved soil biogeochemical models (Dwivedi et al., 2019; Wang et al., 2021), are rarely considered in fully coupled ecosystem scale models (Grant, 2013; Pasut et al., 2021), and are entirely unrepresented in current Earth system models. Moreover, exoenzyme kinetics, when included in depth-resolved models, are represented as a function of microbial biomass, and not as explicit properties that may vary independently due to differences in microbial life strategies or microbe-substrate interactions.

We investigated how kinetic properties and temperature sensitivity of microbial exoenzymes vary with soil depth, and if they may represent depth-dependent traits associated with microbiomes adapted to distinct soil environments. We hypothesized that: (i) enzyme  $V_{max}$  declines with depth, in concert with declines in substrate concentrations and overall nutrient demand; (ii) enzyme affinities and catalytic efficiencies increase with depth to maximize resource acquisition under low substrate concentrations; (iii) variation of kinetic properties with depth differs between C-, N- and P-acquiring enzymes, reflecting differences in relative substrate availability and demand; (iv) temperature sensitivity of exoenzymes increases with depth, reflecting selection of enzymes adapted to lower and narrower temperature ranges in deeper soils. We determined the MM kinetics and catalytic efficiencies of the hydrolytic enzymes  $\beta$ -glucosidase (BG), leucine aminopeptidase (LAP) and acid phosphatase (AP) (involved in C, N and P acquisition, respectively), as a function of both soil dry mass and microbial biomass C, in soils collected at six depths down to 90 cm at a temperate coniferous forest. Furthermore, we investigated enzyme temperature sensitivity based on the Arrhenius model and  $Q_{10}$  coefficients, and on the MMRT model over six temperatures

between 4-50°C, following a fully factorial experimental design considering substrate type and concentration, soil depth and temperature.

## Materials and Methods

### Site Description and Sample Collection

Soil samples were collected at the University of California Blodgett Experimental Forest, Sierra Nevada, CA (120°39'40" W; 38°54'43" N), described by Hicks Pries et al. (2018). Briefly, Blodgett forest is located in a Mediterranean climate with mean annual precipitation of 1,660 mm and a mean annual air temperature of 12.5°C. The soil was classified as Alfisol of granitic origin, and has a developed O horizon. The site is a mixed coniferous forest with ponderosa pine (*Pinus ponderosa*), sugar pine (*Pinus lambertiana*), incense cedar (*Calocedrus decurrens*), white fir (*Abies concolor*) and douglas fir (*Pseudotsuga menziesii*) as dominant tree species. The mean annual soil temperature ranges between 11.5 and 10.4°C at 5 and 100 cm depths, respectively, although soil temperatures vary annually between 0-29°C, 1-19°C and 2-16°C at 5, 30 and 100 cm depth, respectively. Three soil cores were collected in July 2019 using a 4.78 cm diameter soil corer with a 10 kg hand-held slide-hammer. The surface litter layer of the O horizon was removed prior to sampling, and mineral soil samples were recovered sequentially in 10 cm increments down to 90 cm depth. Samples were kept cold during transportation to the laboratory, were they were sieved to 2 mm and stored at 4°C. Samples were analyzed within approximately a week of collection. To ensure the accessibility and discoverability of the samples generated here, and to align with the National Science Foundation's guidelines of effective data practices, all samples have been registered with IGSN Global Sample Numbers through the System for Earth Sample Registration (SESAR). SESAR is maintained by the GeoInformatics Research Group of the Lamont-Doherty Earth Observatory at <https://www.geosamples.org/>. Sample IGSNs are shown in Table S1.

### Exoenzyme Activity Assays

Extracellular hydrolytic enzyme activities were determined fluorometrically according to standard assays (German et al., 2011b) at six depth intervals, following the experimental design in Table 1. Briefly, we used the methylumbelliferone (MUF)-linked substrates MUF- $\beta$ -D-glucopyranoside and MUF-phosphate for determination of  $\beta$ -glucosidase (BG) and acid phosphatase (AP) activities, respectively. Leucine aminopeptidase (LAP) activity was determined using the substrate L-leucine-7-amido-4-methylcoumarin (AMC). Assays were performed for each of six soil depths from each of three replicate soil cores, by combining 200  $\mu$ L of soil homogenate with 50  $\mu$ L of fluorogenic substrate solution in each microplate well. Soil homogenates were prepared using 1 g of fresh soil in 100 mL 50 mM acetate buffer with pH 5.5. Substrate solutions, soil homogenates, serial dilutions of standards in the absence or presence of soil homogenate (quenching controls), and blank controls in the absence or presence of each of the eight substrate concentrations were prepared in the same buffer. Eight serial dilutions of MUF and AMC standards, blank controls with only added substrates, and quenching controls with soil homogenates, but no MUF or AMC added, were performed in duplicate. Each enzyme was assayed individually over a range of eight substrate concentrations, as follows: 10, 30, 60, 100, 150, 250, 450 and 800  $\mu$ M for BG; 10, 20, 40, 70, 110, 190, 350 and 600  $\mu$ M for LAP; and 10, 40, 80, 130, 200, 350, 700 and 1200  $\mu$ M for

AP (Table 1). Parallel assays for each sample, enzyme and substrate concentration were incubated at 4, 10, 16, 25, 35 or 50°C, and fluorescence was recorded after approximately 1, 4 and 24 h to determine the optimal incubation time. Four analytical replicates were measured per sample for each combination of enzyme, substrate concentration and temperature. Incubation temperatures were selected in order to capture the unimodal response predicted by MMRT with  $T_{\text{opt}}$  values well above native temperatures, as observed by previous studies of exoenzymes from temperate environments (Alster et al., 2016b), while including the temperature range and approximate seasonal averages at our experimental site.

### Microbial Biomass C and Dissolved C and N Pools

Microbial biomass C (MBC), dissolved organic C (DOC) and total dissolved N (TDN) were determined at every 10 cm depth interval between 0-90 cm depth. MBC was estimated using the chloroform-fumigation extraction method (Brookes et al., 1985). Five-gram soil samples were fumigated in 50 mL closed vials containing a jumbo cotton ball soaked with ethanol-free chloroform over, but not touching, the soil, for 7 days, with chloroform replenished on day 4. Fumigated and a non-fumigated soil samples were extracted with 25 mL of 0.5 M  $\text{K}_2\text{SO}_4$  on an orbital shaker table for 60 min, then gravity filtered through pre-leached #42 Whatman filter paper, and frozen until further analysis. DOC and TDN in fumigated and non-fumigated samples were quantified using a Lotix Combustion TOC/TN Analyzer (Teledyne Tekmar, Mason, Ohio, USA). No correction factor ( $k_{\text{EC}}$ ) was applied to account for incomplete microbial biomass lysis during the fumigation.

### Data Analyses

All data manipulations and analyses were performed in R versions 3.6.1-4.0.4 (R Core Team, 2020). Net fluorescence in the enzyme assays, including quenching corrections, were calculated following German et al., (2011b). Analytical outliers were identified based on the Interquartile Range method, and a maximum of one value was excluded out of the four analytical replicates per sample. Negative values due to analytical error were excluded from the dataset. Enzyme maximal velocity ( $V_{\text{max}}$ ) and Michaelis constants ( $K_{\text{m}}$ ) were computed by fitting a 2-parameter Michaelis-Menten (MM) model over all analytical replicates per substrate concentration using the *drc* function in the *drc* package (Ritz et al., 2015), with a data-driven self-starter function specific to the model. Following preliminary analyses, and when necessary, we excluded data points corresponding to one of the eight individual substrate concentrations for which all analytical replicates consistently did not fit the distribution of the remaining data (i.e., due to technical errors during assay preparation). In order to alleviate variance heterogeneity of analytical replicates between substrate concentrations, we applied a Box-Cox transformation to all models using the *boxcox* function in the *drc* package (Ritz et al., 2015). Comparison between the parameters  $V_{\text{max}}$  and  $K_{\text{m}}$  estimated based on transformed and non-transformed models showed that Box-Cox transformation improved the fit of models with substantial analytical variance, but had a marginal or no effect on parameters estimated by models with initial good fit. Individual models yielding nonsignificant  $V_{\text{max}}$  or  $K_{\text{m}}$  estimates ( $p > 0.05$ ) after Box-Cox transformation were considered to have bad fit and were thus excluded from further analyses (excluded 11 out of 324 models). To determine the optimal assay incubation time at each temperature, we compared MM models fit to data collected after each of three sequential incubation periods (1, 4 and 24 h). We selected the

minimum incubation period necessary to reach the highest  $V_{\max}$  value, under the assumptions that lower  $V_{\max}$  values reflected either insufficient incubation time for reactions to reach saturation, or loss of fluorescence due to prolonged incubation after saturation had been reached. The same incubation period was consistently selected for all assays performed at the same temperature.  $V_{\max}$  was expressed per mass of dry soil as  $V_{\max/\text{ds}}$  ( $\text{nmol g}^{-1} \text{h}^{-1}$ ) and per unit of microbial biomass C (MBC) as  $V_{\max/\text{MBC}}$  ( $\text{nmol } \mu\text{g MBC}^{-1} \text{h}^{-1}$ ). The apparent catalytic efficiency ( $\text{CE}_{\text{ds}}$ ) was calculated as:

$$\frac{V_{\max/\text{ds}}}{K_m}$$

and the biomass-specific catalytic efficiency ( $\text{CE}_{\text{MBC}}$ ) as:

$$\frac{V_{\max/\text{MBC}}}{K_m}$$

$Q_{10}$  coefficients were calculated over the full experimental temperature range (six temperatures from 4 to 50°C) and over a realistic field range (five temperatures from 4 to 35°C) following the approach by Allison et al. (2018). Briefly, the degree of change in  $V_{\max}$ ,  $K_m$  or CE per °C was inferred based on linear regressions between the natural logarithm of each parameter and temperature, and converted to  $Q_{10}$  values based on the relationship:

$$Q_{10} = \exp(10 \times \text{slope})$$

The Arrhenius activation energy ( $E_a$ ) was calculated based on the slope of the linear regression between  $\ln(V_{\max})$  and  $1/T$ , and the relationship:

$$-E_a = \text{slope} \times R$$

where  $T$  is the temperature in kelvin and  $R$  is the universal gas constant. Linear regression models were calculated using the *lm* function in the *stats* package native to R (R Core Team, 2020). The change in heat capacity ( $\Delta C_p^\ddagger$ ), temperature optimum ( $T_{\text{opt}}$ ) and point of maximum temperature sensitivity ( $\text{TS}_{\max}$ ) were calculated by fitting  $\ln(V_{\max})$  over the six incubation temperatures between 4-50°C using the Macromolecular Rate Theory (MMRT) model, according to the equations and definitions described by Alster et al. (2020). The reference temperature  $T_0$  was set to 315 K to best match the measured data, following the recommendations by Alster et al. (2020). Model fit comparisons were based on the Akaike Information Criterion (AIC) and respective relative likelihoods, corrected AIC (AICc), and Bayesian Information Criterion (BIC), following the guidelines by Burnham and Anderson, (2004). AIC, BIC, and adjusted  $R^2$  values of the linear models were extracted from the linear regression model computed with the *lm* function in the *stats* package (R Core Team, 2020). AICc of all models, and AIC and BIC of the nonlinear models were calculated using the R package *AICcmodavg* (Mazerolle, 2020). One-way and two-way Analyses of Variance (ANOVA) were performed with the *aov* function, followed by post-hoc Tukey's tests using the function *TukeyHSD* with  $p$  values adjusted for multiple comparisons, using the *stats* package (R Core Team, 2020). Compact letter displays for the Tukey's tests were computed with the function *HSD.test* in the package *agricolae* (de Mendiburu and Yaseen, 2020). Assumptions of ANOVA were tested based on Levene's tests with the *leveneTest* function in the package *car* (Fox and Weisberg, 2019), Shapiro-Wilk tests with the *shapiro.test* function in the package *stats* (R Core Team, 2020), skewness of residuals with the *skewness* function in the package *agricolae* (de Mendiburu and Yaseen, 2020), and plots of homogeneity of residuals' variance and normality of residuals (Q-Q plots). Data was ln-transformed as necessary, and all tests reported as significant



were based on a  $p$  value  $< 0.05$ . Figure displays were prepared with the package *cowplot* (Wilke, 2020). The maximum percentage of variation (i.e., decline) in kinetic parameters with depth, per temperature, was calculated as the percentage of difference between the highest and lowest values within the upper and lower depth intervals mentioned in the text, for example:

$$\frac{\max(V_{max}^{0-20\text{ cm}}) - \min(V_{max}^{60-90\text{ cm}})}{\max(V_{max}^{0-20\text{ cm}})} \times 100\%$$

As the ANOVA showed that variation in kinetic parameters with depth was not dependent on temperature, the percentages of variation with depth are reported as the average decline among all temperatures, per enzyme and kinetic parameter. The inconsistently high mean  $K_m$  values only at 16°C was excluded from those calculations.

## Results

### Exoenzyme kinetics vary with soil depth

We determined the MM kinetics of the enzymes acid phosphatase (AP),  $\beta$ -glucosidase (BG), and leucine aminopeptidase (LAP) in soils collected at six depth intervals from triplicate soil cores down to 90 cm (0-10, 10-20, 30-40, 50-60, 60-70 and 80-90 cm), at six temperatures between 4 and 50°C (4, 10, 16, 25, 35 or 50°C) (Table 1). Activity of the three enzymes showed typical MM behavior, and the kinetic parameters  $V_{max}$  and  $K_m$  were computed by fitting a nonlinear regression model of the MM equation to potential enzyme activities over eight substrate concentrations with four analytical replicates. Variation in kinetic parameters with depth and interactions with temperature were tested using two-way fixed effects Analysis of Variance (ANOVA) with depth and temperature as independent factors, followed by post-hoc Tukey's tests.

The  $V_{max}$  of all three enzymes, estimated on a dry soil mass basis ( $V_{max/ds}$ ), declined significantly with soil depth over all temperatures ( $p < 0.001$ ), and differences among depths were not dependent on temperature (i.e., no significant depth  $\times$  temperature interaction) (Figure 1A, Table 2). Mean  $V_{max/ds}$  declined almost continuously from the soil surface (0-20 cm) down to 60-90 cm by up to  $96.4 \pm 0.4\%$  (mean  $\pm$  standard error; see Materials and Methods for details) across all enzymes and temperatures. This variation was only significant between three to four depth ranges, which differed between enzymes (Figure 1A, Table S2):  $V_{max/ds}$  of BG declined progressively down to 60 cm, but not below that depth;  $V_{max/ds}$  of AP declined only over the mid-depth range, from 20 to 30 cm and from 40 to 60 cm;  $V_{max/ds}$  of LAP also did not vary within the upper 20 cm, but declined gradually down to a lower depth than that of AP, namely from 20 to 30 cm, from 40 to 50 cm and from 60 to 80 cm.

Since the concentration of microbial biomass carbon (MBC) declined strongly with soil depth, especially over the upper 30 cm (Figure S1), much of the decline in  $V_{max/ds}$  with depth may have been driven by lower microbial abundance. Therefore, we computed a biomass-specific  $V_{max}$ , by expressing it per unit MBC ( $V_{max/MBC}$ ).  $V_{max/MBC}$  of all enzymes declined significantly down the soil profile over all temperatures, following the same trends as those of  $V_{max/ds}$  ( $p < 0.001$ ) (Tables 2, S2, Figure 1B). The overall decline in  $V_{max/MBC}$  between 10-20 and 60-90 cm was only 8% lower ( $88.4 \pm 1.7\%$ ) than that of  $V_{max/ds}$ , indicating that variation in  $V_{max/ds}$  did not depend primarily on microbial biomass concentration. Like  $V_{max/ds}$ ,  $V_{max/MBC}$  did not show a significant interaction between depth and temperature. Also similar to  $V_{max/ds}$ ,  $V_{max/MBC}$  of AP and LAP did not vary

within the upper 20 cm and declined mostly from 20 to 30 cm (Figure 1B).  $V_{\max/\text{MBC}}$  did not decline significantly over the mid-depth range for either AP or LAP, but it was significantly lower at 80-90 cm than at 30-40 cm for AP, and lower between 60 and 90 cm than at 30-40 cm for LAP.  $V_{\max/\text{MBC}}$  of BG declined more consistently down to 70 cm over all temperatures, but did not vary further.

$K_m$  also declined (i.e., enzyme affinity increased) significantly with depth for all enzymes across temperatures ( $p < 0.001$ ) with no significant interaction between depth and temperature (Tables 2,S2). However,  $K_m$  declined less with depth than  $V_{\max/\text{ds}}$  or  $V_{\max/\text{MBC}}$ , and mainly between the upper 20 cm and lower depths, by up to  $85.6 \pm 1.3\%$ , with some differences between enzymes.  $K_m$  of AP and BG declined with depth following trends similar to those of their  $V_{\max}$  (Figure 2):  $K_m$  of AP declined mainly from 20 to 30 cm and remained relatively constant down to 80 cm, although it was significantly lower at 80-90 cm than at 30-40 cm;  $K_m$  of BG declined consistently down to 40 cm, without further variation (despite a spuriously high mean  $K_m$  at 80-90 cm only at 16°C). Unlike its  $V_{\max}$ , the  $K_m$  of LAP only declined from 20 to 30 cm, and did not vary significantly below that depth.

The apparent (i.e., observed) catalytic efficiency ( $\text{CE}_{\text{ds}}$ ), estimated as the ratio between  $V_{\max/\text{ds}}$  and  $K_m$ , reflects the catalytic efficiency of the enzyme pool present per mass of soil, regardless of microbial abundance or enzyme demand.  $\text{CE}_{\text{ds}}$  declined significantly across temperatures for all enzymes ( $p < 0.001$ ), also without a significant interaction between depth and temperature (Tables 2,S2). The  $\text{CE}_{\text{ds}}$  of BG and LAP followed similar trends and declined mainly over the mid-depth range by up to  $90.5 \pm 1.1\%$  over all temperatures, without significant variation in the upper 20 cm, or below 60 cm (Figure 3A).  $\text{CE}_{\text{ds}}$  of AP declined much less through the soil profile ( $58.1 \pm 3.0\%$ ), and it was only significantly lower at 60-90 cm than in the upper 10 cm. Biomass-specific catalytic efficiency ( $\text{CE}_{\text{MBC}}$ ), estimated as the ratio between  $V_{\max/\text{MBC}}$  and  $K_m$ , represents the inherent catalytic efficiency of the enzyme pool produced by the local microbiome, as a function of its specific enzyme production capacity and demand.  $\text{CE}_{\text{MBC}}$  declined significantly with depth for BG and LAP ( $p < 0.001$ ) across temperatures, but not for AP (Tables 2,S2, Figure 3B).  $\text{CE}_{\text{MBC}}$  of BG and LAP varied less with depth than other kinetic properties, and declined significant mainly below 60 cm by up to  $71.8 \pm 2.5\%$  (Figure 3B). These declines in  $\text{CE}_{\text{MBC}}$  reflected the decline in  $V_{\max/\text{MBC}}$  at lower depths, where  $K_m$  remained relatively constant. Like for all other kinetic parameters, depth-dependent differences in  $\text{CE}_{\text{MBC}}$  were not dependent on temperature (Table 2).

As there was no significant interaction between depth and temperature for any kinetic parameter (Table 2), we performed a random effects ANOVA with depth as independent variable and temperature as block variable, to control for possible confounding effects of the latter on depth-dependent differences. This analysis yielded the same results as the fixed effects ANOVA reported above, with the single exception that  $V_{\max/\text{ds}}$  of AP declined significantly also between 50-60 cm and 80-90 cm (data not shown).

### **Exoenzyme kinetics vary among enzymes as a function of soil depth**

Variation in kinetic parameters among enzymes and interactions with temperature were tested using two-way fixed effects ANOVA per depth, with enzyme and temperature as independent factors, followed by post-hoc Tukey's tests.

All kinetic properties varied significantly among enzymes at all depths and across temperatures ( $p < 0.001$ ), but there was only a significant interaction between enzyme and temperature in the upper 10 cm for  $K_m$ ,  $CE_{ds}$  and  $CE_{MBC}$  ( $p < 0.001$ ) (Table S3).  $V_{max}$  differed significantly among all enzymes at all depths, with AP having consistently the highest values, followed by BG and then LAP ( $p < 0.05$ ) (Table S4, Figure 1A-B).  $K_m$  differed significantly among all enzymes between 10 and 60 cm ( $p < 0.05$ ), but it did not differ between AP and BG in the upper 10 cm or below 60 cm (Table S4, Figure 2). LAP had always the highest  $K_m$  (i.e., lowest affinity). In contrast, BG had always the lowest  $K_m$ , at least at depths where it was significantly different than that of AP (i.e., between 10 and 60 cm).  $CE_{MBC}$  differed significantly among all enzymes in the upper 10 cm and below 50 cm ( $p < 0.05$ ), but not between AP and BG from 10 to 40 cm (Table S4, Figure 3B). Similar to  $V_{max}$ , the  $CE_{MBC}$  of LAP was always the lowest among enzymes, followed by those of BG and then AP at depths where it differed significantly (Table S4, Figure 3B). As  $CE_{MBC}$  was calculated based on the same MBC value for all enzymes at each depth,  $CE_{ds}$  varied between enzymes similarly to  $CE_{MBC}$  (Table S4, Figure 3A).

We investigated the ratios between kinetic properties ( $V_{max}$ ,  $K_m$ , and CE) of the three different enzymes as indicators for variation in relative nutrient demand through the soil profile. Based on two-way fixed effects ANOVA with depth and temperature as independent factors, all kinetic ratios between enzymes varied significantly with depth over all temperatures, with the exception of ratios between  $K_m$  of LAP and AP ( $K_m^{LAP:AP}$ ) ( $p < 0.005$ ) (Table S5). Temperature had a significant, positive effect on the  $V_{max}$  ratio of BG to AP ( $V_{max}^{BG:AP}$ ), and LAP to AP ( $V_{max}^{LAP:AP}$ ), and a significant, negative effect on ratios between catalytic efficiencies of BG and LAP ( $CE^{BG:LAP}$ ) ( $p < 0.05$ ). Only  $CE^{BG:LAP}$  showed a depth  $\times$  temperature interaction ( $p < 0.05$ ) (Table S5, Figure 4A-I).  $V_{max}^{BG:LAP}$  declined significantly from 10 to 20 cm, followed by a suggestive continuous increase down to 90 cm, although it was only significantly higher at 80-90 cm than at 10-20 cm (Figure 4A).  $V_{max}^{BG:AP}$  declined with depth down to 70 cm, mainly from 10 to 20 cm and from 40 to 60 cm, followed by a significant increase from 70 to 90 cm that appeared to result partially from a spurious high value only at 16°C, among all six temperatures (Figure 4B).  $V_{max}^{LAP:AP}$  generally declined with depth below 20 cm, but this variation was mainly significant between the upper 20 cm and the lower 30 cm (i.e., from 60 to 90 cm) (Figure 4C).  $K_m^{BG:LAP}$  and  $K_m^{BG:AP}$  followed trends similar to those of their corresponding  $V_{max}$  ratios:  $K_m^{BG:LAP}$  declined significantly from 10 to 20 cm and remained relatively invariant through the profile (Figure 4D), whereas  $K_m^{BG:AP}$  declined from 10 to 20 cm, followed by a suggestive but non-significant increase down to 70 cm (Figure 4E). The significant increases in  $K_m^{BG:LAP}$  and  $K_m^{BG:AP}$  at 80-90 cm were likely driven, at least partially, by the same spurious high  $K_m$  value of BG only at 16°C mentioned above. In contrast,  $K_m^{LAP:AP}$  did not vary significantly with depth nor show any apparent trends (Figure 4F).  $CE^{BG:LAP}$  increased significantly from the upper 20 cm to a depth of 30-40 cm, although below that depth it did not vary significantly from any upper depths (Figure 4G).  $CE^{BG:AP}$  did not vary within the upper 40 cm, but it was significantly lower below 50 cm (Figure 4H).  $CE^{LAP:AP}$  declined with depth below 20 cm, but this variation was only significant between the upper 40 cm and the lower 30 cm (from 60 to 90 cm) (Figure 4I). This variation in  $CE^{LAP:AP}$  with depth mirrored the general trend of  $V_{max}^{LAP:AP}$ , as  $K_m^{LAP:AP}$  was relatively invariant though the soil profile.

## Comparison of temperature sensitivity based on Arrhenius and Macromolecular Rate Theory models

The temperature sensitivity of enzyme  $V_{\max}$  was determined using a linear Arrhenius model over the full temperature range tested (4-50°C,  $n = 6$ ) (Figure S2) and a realistic *in situ* soil range (4-35°C,  $n = 5$ ) (Figure 5), as well as the non-linear MMRT model over the full temperature range (4-50°C,  $n = 6$ ). The great majority of individual MMRT models ( $n = 54$ ) approached the expected unimodal behavior, whose highest point represents  $T_{\text{opt}}$  (Figure 6). Despite the relatively high adjusted  $R^2$  values of the linear Arrhenius models over the full temperature range ( $0.81 \pm 0.02$ , mean  $\pm$  se) (Table S6), there was a general decline in the response rate of  $V_{\max}$  between the two highest temperatures consistent with MMRT predictions, even when  $T_{\text{opt}}$  was not reached (Figure 6). The temperature response of  $V_{\max}$  in four of the 54 individual models did not fit the assumptions of MMRT, resulting in biologically implausible  $T_{\text{opt}}$  and  $TS_{\max}$  estimates for these soils, namely negative values due to an upward concave response (AP at 10-20 cm and BG at 50-60 cm, replicate 3), or values above 200°C due to approximately linear responses (BG at 60-70 cm, replicate 1; and BG at 10-20 cm, replicate 3) (Figure 6, Table S7). These model estimates were thus excluded from further analyses. Comparisons between alternative Arrhenius and MMRT models based on the Akaike Information Criterion (AIC), corrected AIC (AICc) and Bayesian Information Criterion (BIC) standard indices indicated that, in general, their model fit did not differ substantially (see also Supplementary Results). Nevertheless, overall model comparisons tended to favor MMRT, which further suggested that MMRT provided a more realistic representation of the temperature response of enzyme  $V_{\max}$ .

## Temperature sensitivity of exoenzymes is similar through the soil profile

Temperature had an overall significant effect on  $V_{\max}$ ,  $CE_{\text{MBC}}$  and  $CE_{\text{ds}}$  of all enzymes, and on  $K_m$  of only BG, over the whole soil profile ( $p < 0.001$ ) (Table 2, Figures 1-3). Enzyme temperature sensitivity was further assessed based on  $Q_{10}$  coefficients of  $V_{\max}$  ( $V_{\max/\text{MBC}}$  and  $V_{\max/\text{ds}}$  scale identically with temperature at each depth),  $K_m$  and  $CE$  ( $CE_{\text{MBC}}$  and  $CE_{\text{ds}}$  scale identically with temperature at each depth) following the Arrhenius model assumption of linearity, and on the temperature optimum ( $T_{\text{opt}}$ ), point of maximum temperature sensitivity ( $TS_{\max}$ ) and change in heat capacity ( $\Delta C_p^\ddagger$ ) estimated using the non-linear MMRT model. Differences in temperature sensitivity parameters between depths or enzymes were tested with one-way ANOVA per enzyme or depth, respectively.

Despite some suggestive, depth-dependent trends in the  $Q_{10}$  values of  $V_{\max}$ ,  $K_m$  and  $CE$ , they did not vary significantly with depth for any enzyme (Table 3), whether estimated over a realistic *in situ* soil temperature range (4-35°C) (Figure 7), or the full experimental temperature range (4-50°C) (Figure S3). However,  $Q_{10}$  values varied significantly between some enzymes in a depth-dependent manner (Tables S9-S10). Both temperature ranges yielded similar  $Q_{10}$  values that varied within a narrow range, although  $Q_{10}$  values over 4-50°C were slightly lower than those over 4-35°C due to a frequent decline in the response rate of  $V_{\max}$  between 35 and 50°C (Table S8). Therefore, only  $Q_{10}$  values over the realistic *in situ* soil temperature range are henceforth presented. The  $Q_{10}$  of  $V_{\max}$  was consistently above 1, indicating a positive effect of temperature on  $V_{\max}$  across depths of  $1.44 \pm 0.03$ ,  $1.56 \pm 0.03$  and  $1.78 \pm 0.10$  (mean  $\pm$  se) for AP, BG and LAP, respectively (Figure 7A, Table S8). Mean activation energies ( $E_a$ ) estimated from the same linear relationships were  $25.69 \pm 1.74$ ,  $31.50 \pm 1.45$ , and  $39.33 \pm 3.98$  kJ mol<sup>-1</sup> K<sup>-1</sup> (mean  $\pm$  se) across depths for AP,

BG and LAP respectively (Table S8). Between enzymes, the  $Q_{10}$  of  $V_{\max}$  was only significantly different between AP and LAP at 60-70 cm ( $p < 0.05$ ) (Table S10).  $K_m$  was relatively insensitive to temperature, with mean  $Q_{10}$  values across depths of  $1.00 \pm 0.06$ ,  $1.14 \pm 0.05$  and  $0.99 \pm 0.07$  (mean  $\pm$  se) for AP, BG and LAP, respectively (Figure 7B, Table S8). This was consistent with the two-way ANOVA showing that temperature had generally no significant effect on  $K_m$ . The significant effect of temperature on the  $K_m$  of BG detected by the two-way ANOVA was likely due to the spurious high  $K_m$  of BG only at 16°C at 80-90 cm (Table 2, Figure 2), which was not reflected on the  $Q_{10}$  computed across temperatures. Although the mean  $Q_{10}$  of  $K_m$  was similar between enzymes and depths, it was significantly lower for LAP in the upper 10 cm relative to the other two enzymes ( $p < 0.05$ ) (Figure 7B, Table S10). This difference suggested that the affinity of LAP might increase with warmer temperatures (i.e., lower  $K_m$ ) at this depth ( $Q_{10} = 0.83 \pm 0.07$ , mean  $\pm$  se), compared to those of AP ( $Q_{10} = 1.18 \pm 0.06$ ) or BG ( $Q_{10} = 1.30 \pm 0.07$ ). The  $Q_{10}$  of CE was consistently above 1, similar to that of  $V_{\max}$ , with similar overall mean values across enzymes:  $1.51 \pm 0.08$ ,  $1.42 \pm 0.08$  and  $1.82 \pm 0.05$  (mean  $\pm$  se) for AP, BG and LAP respectively (Figure 7C, Table S8). However, the  $Q_{10}$  of CE was significantly higher for LAP in the upper 10 cm ( $1.86 \pm 0.07$ , mean  $\pm$  se) relative to those of AP ( $1.27 \pm 0.02$ ) or BG ( $1.20 \pm 0.08$ ) ( $p < 0.05$ ) (Figure 7C, Table S10), reflecting the apparent negative effect of higher temperatures on the  $K_m$  of LAP at that depth.

None of the temperature sensitivity parameters estimated by MMRT –  $T_{\text{opt}}$ ,  $TS_{\text{max}}$  and  $\Delta C_p^{\ddagger}$  – varied significantly with depth (with one exception; see below), or between enzymes (Figure 8, Tables 3, S9). These parameter estimates showed considerable variability among replicates, and estimates from models with poor fit to MMRT's predicted behavior ( $T_{\text{opt}}$  or  $TS_{\text{max}} < 0^\circ\text{C}$ , or  $> 200^\circ\text{C}$ ; four out of 54 total models) were excluded from the analysis, likely reducing the statistical power of few pairwise comparisons between depths and enzymes. Mean  $T_{\text{opt}}$  and  $TS_{\text{max}}$  were consistent across depths and enzymes, with mean values of  $65.19 \pm 3.74^\circ\text{C}$  and  $31.63 \pm 1.98^\circ\text{C}$  (mean  $\pm$  se), respectively (Figure 8A-B, Table S8).  $TS_{\text{max}}$  of LAP was significantly different between the 0-10 and 30-40 cm depth intervals ( $p < 0.05$ ), which was the only exception to otherwise non-significantly different parameter estimates across either enzymes or depths. Mean  $\Delta C_p^{\ddagger}$  values were similar between AP and BG across depths, with a combined mean value of  $-0.79 \pm 0.06 \text{ kJ mol}^{-1} \text{ K}^{-1}$  (mean  $\pm$  se) (Figure 8C, Table S8).  $\Delta C_p^{\ddagger}$  of LAP spanned a broader range of values ( $-1.32 \pm 0.21$ , mean  $\pm$  se), mainly due to suggestive, albeit non-significant, lower values at depths below 60 cm.

## Discussion

We show that kinetic properties of the enzymes BG, LAP and AP varied markedly through the soil profile at a temperate forest, even when accounting for the large variation in microbial biomass. Moreover, this variation in enzyme kinetics was independent from temperature, as kinetic properties varied similarly between soil depths over temperatures between 4 and 50°C. We also show that the temperature sensitivity of these enzymes is similar through the soil profile, based on both linear Arrhenius and non-linear MMRT models, although temperature can directly affect the relative kinetics between enzyme types. To our knowledge, this is the first study to investigate the MM kinetic properties of soil enzymes and their direct temperature sensitivity through the soil profile, in this case to 90 cm.

## **Higher enzyme affinity, but lower $V_{\max}$ and catalytic efficiency, indicate adaptation to lower substrate availability and distinct microbial life strategies in deeper soils.**

As hypothesized,  $V_{\max/ds}$  and  $K_m$  declined strongly with soil depth, but followed distinct trends that depended on enzyme type. The decline in  $V_{\max/ds}$  of  $96.4 \pm 0.4\%$  across enzymes and temperatures down to 90 cm indicated a drastic decline in enzyme production capacity, product demand, or substrate availability. This was consistent with the lower microbial biomass concentrations in deeper soils observed here, as generally reported across studies (Blume et al., 2002; Fierer et al., 2003a; Jones et al., 2018; Loeppmann et al., 2016a; Schneckner et al., 2014). Higher density of plant roots in surface soils may have also contributed to higher near-surface  $V_{\max/ds}$ , as shown particularly for BG in rooted soils when compared to fallow soils (Loeppmann et al., 2016b), and in rhizosphere hotspots when compared to bulk soil (Tian et al., 2020). Plants may induce higher enzyme  $V_{\max}$  by promoting microbial growth through C-rich exudates, competing with microbes for N and P, or directly stimulating microbial enzyme production to enhance availability of assimilable products (Burns et al., 2013). Declines in activity of hydrolytic enzymes have been consistently observed down to depths between 50 and 420 cm in diverse soils, including from temperate, taiga and tropical forests, arctic tundra, grasslands and croplands (Darby et al., 2020; Dove et al., 2020; Gelsomino and Azzellino, 2011; Jing et al., 2017; Kramer et al., 2013; Loeppmann et al., 2016a; Schneckner et al., 2014, 2015; Stone et al., 2014; Taylor et al., 2002; Venkatesan and Senthurpandian, 2006). However, among the five studies from which we could retrieve at least approximate  $V_{\max/ds}$  values, only Loeppmann et al. (2016a) observed mean declines in  $V_{\max/ds}$  of BG, LAP and AP down to 70 cm similar to those observed here down to 90 cm ( $91.0 \pm 2.2\%$ ), whereas others observed substantially smaller mean declines of approximately  $67.5 \pm 6.3\%$  for AP and BG at depths between 55 and 110 cm (Gelsomino and Azzellino, 2011; Stone et al., 2014; Venkatesan and Senthurpandian, 2006). Consistent with this, only Loeppmann et al. (2016a) determined  $V_{\max}$  based on a MM model over a series of enzyme substrate concentrations, as needed to estimate MM kinetics accurately. Potential enzyme activities have been frequently shown to correlate positively with MBC concentration (Gelsomino and Azzellino, 2011; Perucci, 1992; Ren et al., 2018; Stone et al., 2014), as  $V_{\max}$  is linearly dependent on enzyme concentration, which in turn is largely dependent on microbial abundance. However, this is not always the case (Waring et al., 2014), as exoenzyme production may also be induced or repressed depending on substrate availability and product demand, following the evolutionary-economic mechanisms that regulate allocation of cellular resources (Allison et al., 2011; German et al., 2011a). Moreover, enzyme production varies between organisms and is subject to variable levels of regulation (Allison et al., 2011; Burns et al., 2013; Sinsabaugh and Shah, 2012). For example, some isozymes and enzyme types may be expressed at stable constitutional levels under specific conditions, as previously suggested for deep soils (Stone et al., 2014), whereas others may be more strictly responsive to cellular demands or environmental cues. Therefore, a biomass-specific  $V_{\max}$  ( $V_{\max/MBC}$ ) can be interpreted as a catalytic rate constant independent of microbial abundance, which represents the collective effect of inherent enzyme properties, and specific enzyme production and demand of the microbiome. Surprisingly,  $V_{\max/MBC}$  of all enzymes declined nearly as much with depth as  $V_{\max/ds}$ , indicating that microbial abundance was not the primary driver of variation in  $V_{\max}$ . Loeppmann et al. (2016a) found similar trends only for BG and LAP, and only below 30-40 cm, as  $V_{\max/MBC}$  increased from the surface to that depth and only then declined consistently down to 70 cm. These differences might have resulted from a steeper decline in substrate availability and microbial biomass in our soils, which are covered by a thick litter layer and have a shallow rhizosphere, compared to a more extensive rhizosphere (i.e., maize) and less

surface litter in the soils studied by Loepmann et al. (2016a). The consistent decline in  $V_{\max/\text{MBC}}$  in deeper soils observed by us, and to some extent also Loepmann et al. (2016a), contrasts with most other studies where  $V_{\max/\text{MBC}}$  of AP, BG and LAP either increased, or did not vary with depth (Dove et al., 2020; Gelsomino and Azzellino, 2011; Kramer et al., 2013; Schnecker et al., 2015; Stone et al., 2014). We could only identify one study that detected a decline in  $V_{\max/\text{MBC}}$  of BG (Taylor et al., 2002), although declines with depth have been more frequently observed for other enzymes (Gelsomino and Azzellino, 2011; Schnecker et al., 2015; Taylor et al., 2002). However,  $V_{\max}$  in those studies was inferred from a single concentration of substrate across depths that was generally below the saturation point necessary to reach the  $V_{\max}$  values we observed, particularly in surface soils. We suggest that the apparent increase, or lack of variation, in  $V_{\max/\text{MBC}}$  previously observed may have resulted from underestimating  $V_{\max}$  in surface soils. Our results indicate that exoenzyme pools in deeper soils have inherently low activity potential due to lower expression levels and/or lower catalytic capabilities than those in surface soils, possibly reflecting differences in microbial life strategies and substrate preferences.

The consistent increase in affinity (i.e., decrease in  $K_m$ ) of all enzymes with depth by  $85.6 \pm 1.3\%$ , mainly between 20 and 60 cm, indicated a major decline in substrate availability at mid-depths consistent with the decline in DOC, TDN (Figures S4A-B) and total C and N in these soils (Hicks Pries et al., 2017, 2018). This supported our hypothesis that persistently low substrate concentrations in deep soils select for microbes encoding isozymes with lower  $K_m$  in order to maintain relatively constant maximal catalytic rates (Sinsabaugh et al., 2014).  $K_m$  values largely above physiologic substrate concentrations would render enzyme activity entirely dependent on substrate availability, which, under deep soil conditions, would lead to suboptimal rates and provide limited return to the investment on enzymes. Conversely, higher substrate availability in surface soils through plant litter inputs likely alleviates the selective pressure on enzymes with high affinity. Inputs of readily assimilable compounds through root exudation may further alleviate this pressure by reducing the relative importance of continuously maintaining maximal depolymerization rates (Allison et al., 2011), similar to what has been observed for substrate induced respiration (Blagodatskaya et al., 2009). The variation in enzyme affinities with depth observed here indeed appeared to reflect the overall decline in root density—both fine and coarse roots—below 40 cm at this site (Hicks Pries et al., 2018). The  $K_m$  of BG particularly mirrored the continuous steep decline in fine root density down to 40 cm (Hicks Pries et al., 2018), whereas those of AP and LAP did not vary within the upper 20 cm. This suggests that availability of easily metabolizable C-containing compounds exuded by fine roots may have a particular regulatory effect on depolymerization of cellulose (Allison et al., 2011; Allison and Vitousek, 2005) through selection of microbes encoding BG isozymes with distinct affinities. This hypothesis is further supported by the higher affinities of cellulose-degradation enzymes, including BG, observed in fallow soils relative to rooted soils (Loepmann et al., 2016b), and in bulk soils relative to rhizosphere hotspots (Tian et al., 2020). Moreover, microbes producing BG in the rhizosphere have been shown to be distinct from those in the detritosphere (Nuccio et al., 2020).

The catalytic efficiency (CE), also referred to as specificity constant (Gelsomino and Azzellino, 2011), can be determined as  $K_{\text{cat}}/K_m$  when  $K_m$  exceeds the concentration of substrate present, which is typically the case under physiological conditions (Berg et al., 2002; Koshland, 2002). Therefore, CE not only represents a fundamental functional property under direct selective pressure, but also evolutionary tradeoffs between maximum substrate turnover ( $K_{\text{cat}}$ ) and affinity, which are themselves subject to selection (Sinsabaugh et al., 2014). However,  $K_{\text{cat}}$  expresses the maximum amount of substrate converted per unit of time, per enzyme unit, and thus it cannot be directly

inferred from enzyme assays in complex environmental samples, such as soils, where specific enzyme concentrations are generally unknown and hard to quantify. In these cases, an apparent CE ( $CE_{ds}$ ) has been estimated as  $V_{max/ds}/K_m$  (Kujur and Kumar Patel, 2014; Loepmann et al., 2016b, 2016a; Moscatelli et al., 2012; Razavi et al., 2016; Triebwasser-Freese et al., 2015), which represents the observed CE of the enzyme pool present per mass of soil, regardless of the specific production capacity and demand of the microbiome. In our soils,  $CE_{ds}$  of all enzymes declined significantly with depth, with  $CE_{ds}$  of BG and LAP declining consistently over the mid-depth (20 to 60 cm) by up to ~90%, whereas that of AP varied much less. These results are consistent with those from the only other study that, to our knowledge, determined  $CE_{ds}$  in deep soils, where  $CE_{ds}$  of these same enzymes declined by 2- to 20-fold between the upper 40 cm and depths down to 70 cm (Loepmann et al., 2016a). Tian et al. (2020) have also shown that  $CE_{ds}$  of BG and AP was higher in fertile soils than in nutrient-poor soils, consistent with higher  $CE_{ds}$  in surface soils with greater nutrient availability than deep soils. However, contrary to our initial expectations, CE based on biomass-specific  $V_{max}$  ( $CE_{MBC}$ ) either declined by up to ~70% (BG and LAP) or did not vary (AP) with depth. We initially hypothesized that CE would increase with depth to maximize return on the investment in enzymes, given the scarce substrates provided by lower plant litter inputs and lower compensation by root exudates. Microbial communities adapted to these conditions would be expected to encode isozymes with higher affinity (i.e., lower  $K_m$ ) and/or produce more exoenzymes per unit biomass (i.e., higher  $V_{max/MBC}$ ) in a proportion that favors higher  $V_{max/MBC}/K_m$  ratios (i.e.,  $CE_{MBC}$ ). As the  $K_m$  values of BG and LAP were relatively invariable between 30 and 90 cm, their lower  $CE_{MBC}$  at depths below 60 cm was mainly driven by a decline in  $V_{max/MBC}$ , suggesting that it was constrained by lower production of enzymes per unit biomass below that depth, rather than higher  $K_m$ . On the other hand, enzymes may optimize  $K_{cat}$  in adaptation to environmental pressures (e.g., temperature) at the expense of  $K_m$ , leading to conformational adaptations that reduce active site binding, which result in higher  $K_m$  and suboptimal catalytic efficiencies (Struvay and Feller, 2012). Therefore, a lower  $CE_{MBC}$  in deeper soils driven by lower  $V_{max/MBC}$  may also reflect enzymes with lower  $K_{cat}$ , as a result of trade-offs with  $K_m$ , rather than lower enzyme production. The contrasting lack of variation in  $CE_{MBC}$  of AP with depth, regardless of individual variation in  $V_{max/MBC}$  and  $K_m$ , might have resulted from different factors and interactions related to variation in relative P availability and demand, and in regulation of AP expression. Alternatively, P may be primarily acquired from minerals rather than organic compounds (Alori et al., 2017), and thus the  $CE_{MBC}$  of AP alone does not directly reflect P demand.

Our results suggest that microbial communities in deep subsoils encode exoenzymes with intrinsically lower  $K_{cat}$ , and/or produce less enzymes per cell than those in surface soils, leading to a lower emergent  $CE_{MBC}$ . The expectation that  $V_{max/MBC}$  and  $CE_{MBC}$  would increase with depth assumes that microbiomes have largely redundant metabolic and elemental demands, and thus exoenzymes are optimized to provide nutrients in proportion to the size and demands of the community, as a function of nutrient availability (Allison et al., 2011). However, several studies have shown that microbiomes change markedly with soil depth (Eilers et al., 2012; Fierer et al., 2003b; Hansel et al., 2008; Hartmann et al., 2009; Jiao et al., 2018; Liu et al., 2019), with deep soils harboring less diverse and functionally distinct organisms (Brewer et al., 2019; Diamond et al., 2019; Dove et al., 2021; Yan et al., 2019). Life strategies that prioritize cellular maintenance over fast growth and maximal resource exploitation, and properties such as utilization of alternative substrates, storage compound production, and ability to sporulate or undergo dormancy may all affect exoenzyme properties, and possibly contribute to relax selective pressures on their



kinetics (Ho et al., 2017; Ramin and Allison, 2019). Dove et al. (2021) have shown that deep soil microbes at our site have lower growth rates and lower carbon use efficiency than those at the surface, reflecting a lower nutrient demand and greater investment on cellular maintenance that may underlie the lower  $V_{\max}/\text{MBC}$  and  $\text{CE}_{\text{MBC}}$  we observed. Moreover, the declining substrate availability with depth is expected to decrease the return on exoenzyme investment and favor alternative metabolic strategies that do not rely primarily on depolymerization of complex organic matter. Dove et al. (2021) have indeed shown that microbiomes in these deep soils have lower potential to degrade complex carbohydrates, similar to those in other soils (Diamond et al., 2019). Conversely, it has been shown that deep soil communities are enriched in organisms that can metabolize C1 and other low molecular weight C compounds, and use inorganic N forms as energy sources (Brewer et al., 2019; Diamond et al., 2019), as well as in taxa that comprise mainly chemoautotrophs (Brewer et al., 2019; Cao et al., 2012; Diamond et al., 2019; Eilers et al., 2012; Turner et al., 2017). Therefore, a smaller fraction of organisms relying on exoenzymes in deep soils is also likely to contribute to a lower emergent  $\text{CE}_{\text{MBC}}$  due to both lower overall biomass-specific enzyme production and lower competition for enzyme products within the community.

### **Kinetics varied between enzymes and indicated an increasing demand in P with depth relative to C and N**

As expected,  $V_{\max}$  differed significantly between all three enzymes at every depth, reflecting fundamental differences in relative nutrient demand, as well as possible differences in enzyme properties and regulation. According to coenzymatic stoichiometry, ratios between  $V_{\max}$  of hydrolytic enzymes involved in acquisition of C, N or P reflect the relative demand in these elements in relation to their availability, and thus the equilibrium between microbial biomass and SOM stoichiometry (Sinsabaugh and Shah, 2012). Here, both  $V_{\max}$  and CE ratios between C- and N-acquiring enzymes ( $V_{\max}^{\text{BG:LAP}}$  and  $\text{CE}^{\text{BG:LAP}}$ , respectively) were relatively constant through the soil profile, despite suggestive increases at lower depths, which were consistent with the trend in soil C:N ratio (Hicks Pries et al., 2018) and ratios between dissolved C and N pools (Figure S4C). Consistently, laboratory incubations with substrate amendments have also shown that the proximate C limitation of soil heterotrophic respiration is similar between shallow and deep soils at this site (Dove et al., 2021). In turn,  $V_{\max}$  and CE ratios between BG:AP and LAP:AP decreased with depth, suggesting an increasing demand for P relative to either C or N, similar to previous observations of ratios between activities of C- and P-acquiring enzymes in both temperate and tropical soils (Loeppmann et al., 2016a; Stone et al., 2014). While Dove et al. (2021) have shown that the proximate nutrient limitation of respiration was generally higher in surface soils, they applied combined N and P amendments, which might have masked the effects of individual nutrients on respiration at different soil depths. Together, these observations contrasted with the generally expected increase in C limitation of heterotrophic growth with depth, following the typical declines in C:N and C:P ratios (Fierer et al., 2003a; Mooshammer et al., 2014; Ni et al., 2020; Taylor et al., 2002). Alternatively, it has been shown that microbes can use phosphorylated compounds primarily as a C source (Heuck et al., 2015), and thus higher  $V_{\max}$  and CE of AP may rather indicate higher C demand in the absence of more favorable C sources in deep soils, as previously suggested (Stone et al., 2014). It should be noted, however, that depolymerization of organic matter and nutrient acquisition involves also other enzymes, and therefore the enzyme investigated here may not fully represent C, N or P demand and availability (Sinsabaugh and Shah, 2012).

## Enzyme temperature sensitivity is similar through the soil profile across enzyme types

Our results confirmed the general expectation that activity of BG, LAP and AP is stimulated by warming, with  $Q_{10}$  values for  $V_{\max}$  and activation energies within the ranges typically observed for soil exoenzymes (Brzostek and Finzi, 2012; German et al., 2012; Nottingham et al., 2016; Razavi et al., 2015, 2016; Steinweg et al., 2013; Stone et al., 2012; Trasar-Cepeda et al., 2007). However, despite few suggestive trends, temperature sensitivity did not vary significantly with depth for any enzyme or kinetic property based on either  $Q_{10}$ , following a linear Arrhenius model, or  $T_{\text{opt}}$ ,  $TS_{\max}$  and  $\Delta C_p^\ddagger$  of  $V_{\max}$  estimated by the non-linear MMRT model. We could not determine unambiguously whether the response of  $V_{\max}$  to temperature was best explained by Arrhenius or MMRT models, although comparisons suggested that the latter generally fit the data better. Moreover, temperature response rates of  $V_{\max}$  declined at higher temperatures in most cases, as observed by other studies (Alster et al., 2016a, 2018), further indicating that MMRT represented a more realistic temperature response behavior. On the other hand, this also indicated that the linear models captured the temperature response better under lower temperatures within the native temperature range, before response rates slowed towards  $T_{\text{opt}}$ , similar to what has been observed by Alster et al. (2016a). The uniform temperature sensitivity observed here contradicted our initial hypothesis that exoenzymes in deeper soils are more sensitive to warming as a result of microbial adaptation to lower and narrower temperature ranges (Schipper et al., 2014). Previous studies have observed that exoenzymes from colder soil environments tend to be more sensitive to warming (Brzostek and Finzi, 2012; Koch et al., 2007), as well as in some subsoils in relation to surface soils (Steinweg et al., 2013). Therefore, we expected that  $Q_{10}$  values and activation energies would increase with depth, whereas either  $T_{\text{opt}}$ ,  $\Delta C_p^\ddagger$ , or both, would decrease. Under MMRT's Optimum-Driven hypothesis, the more frequent lower temperatures in deeper soils could select for enzymes with lower  $T_{\text{opt}}$ , regardless of their  $\Delta C_p^\ddagger$  (Alster et al., 2020). Conversely, the Thermal Breadth hypothesis postulates that enzymes subject to large temperature ranges have less negative  $\Delta C_p^\ddagger$  (i.e., flatter temperature response curves) but not necessarily different  $T_{\text{opt}}$ , and thus the narrower temperature ranges in deeper soils would lead to more negative  $\Delta C_p^\ddagger$  (Alster et al., 2020). In turn, the Enzyme Rigidity hypothesis predicts that cold-adapted enzymes have more negative  $\Delta C_p^\ddagger$  due to their lower rigidity, which would lead to a decline in  $\Delta C_p^\ddagger$ , and consequently  $T_{\text{opt}}$ , with depth, following selection of enzymes adapted to lower temperatures (Alster et al., 2020). The constant temperature sensitivity of all enzymes through the soil profile may instead reflect a convergence of enzyme  $T_{\text{opt}}$  towards the similar MATs across depths at our site (10.4-11.5°C), despite different temperature ranges. On the other hand, the low MATs of our soils appear to contradict the relatively high  $\Delta C_p^\ddagger$  observed, compared to values previously reported (Alster et al., 2016a, 2018), which are expected to reflect a high enzyme rigidity typical of warm-adapted enzymes. It is possible that enzyme  $\Delta C_p^\ddagger$  in our soils are mainly driven by their wide temperature ranges, despite their narrowing with depth, leading to selection of enzymes with less negative  $\Delta C_p^\ddagger$ , and thus able to maintain more constant activity rates under varying temperatures (Alster et al., 2020). Moreover, reactions potentially involving a diverse isozyme pool, such as those measured here, reflect the summation of the temperature response curves of those enzymes, and thus are also expected to have a less negative  $\Delta C_p^\ddagger$  (Alster et al., 2018).

Our results are consistent with the uniform temperature sensitivity (apparent  $Q_{10}$ ) of *in situ* soil respiration over the top meter of soil previously observed at this site (Hicks Pries et al., 2017). This suggests that SOM depolymerization by exoenzymes may be closely linked to the response

of total soil respiration to warming, likely by modulating the contribution of microbial heterotrophic metabolism. In turn,  $K_m$  was relatively insensitive to temperature, with mean  $Q_{10}$  values around 1 across depths and enzymes. This suggests that enzyme affinities may be biochemically constrained to prevent being affected by temperature fluctuations, as previously suggested (Allison et al., 2018).  $T_{opt}$  ( $65.19 \pm 3.74^\circ\text{C}$ ) was much higher than natural soil temperatures, whereas  $TS_{max}$  ( $31.63 \pm 1.98^\circ\text{C}$ ) was just above the temperature maximum in surface soils ( $29^\circ\text{C}$  at 5 cm), but substantially higher than those at lower depths ( $19^\circ\text{C}$  at 30 cm and  $16^\circ\text{C}$  at 100 cm), or mean annual temperatures (MAT) over the upper meter of soil ( $10.4\text{--}11.5^\circ\text{C}$ ). Similar high  $T_{opt}$  estimates based on MMRT have been generally observed for microbial exoenzyme activities and complex metabolic processes in soils (Schipper et al., 2014), and for soil bacterial isolates (Alster et al., 2016a). This is consistent with the fact that the thermal stability and optimal catalytic temperature of enzymes from mesophilic organisms tend to be higher than that of their native environment (Engqvist, 2018). While persistent warming is expected to induce higher enzyme activity through the whole soil profile, a uniform  $TS_{max}$  may, however, result in variable net annual temperature responses at different depths due to their different temperature ranges and seasonal variation. As response rates get faster when temperatures approach  $TS_{max}$ , small temperature increases may disproportionately stimulate enzyme activity in surface soils in warmer months, when temperature frequently approaches  $TS_{max}$ . However, warming above  $TS_{max}$  would cancel that effect. In turn, temperatures in deeper soils are never close to  $TS_{max}$ , but sustained warming will bring them closer to it throughout the year within a narrower and more stable range than in surface soils, where temperature oscillates quicker, more frequently, and further away from  $TS_{max}$ . How these possible scenarios may play out in response to sustained long-term warming will depend on the degree of thermal adaptability of exoenzymes through changes in microbial community composition, and expression of isozymes with different thermal properties (Bradford, 2013; Wallenstein et al., 2011). It should be noted, however, that we cannot completely rule out the possibility that the spatial variability of some temperature sensitivity estimates might have precluded detection of robust differences between depths.

### **Different enzymes have similar temperature sensitivities but warming can affect their relative kinetics in a depth-dependent manner**

The magnitude of all temperature sensitivity parameters was remarkably similar between enzymes through the soil profile, although  $Q_{10}$  values of  $V_{max}$  and  $K_m$  have been frequently shown to vary between co-occurring soil enzymes (Wallenstein et al., 2011). Likewise,  $T_{opt}$ ,  $TS_{max}$  and  $\Delta C_p^\ddagger$  can vary substantially between enzymes (Alster et al., 2016a). Nevertheless, we did observe a significantly lower  $Q_{10}$  of  $K_m$  and consequently higher  $Q_{10}$  of CE of LAP in the upper 10 cm, relative to the other enzymes. The fact that the mean  $Q_{10}$  of  $K_m$  of LAP was below 1 ( $Q_{10} = 0.83$ ), while those of BG and AP were not ( $Q_{10} = 1.30$  and  $1.18$ , respectively), suggested that the affinity of LAP was positively stimulated by warming at this depth (i.e.,  $K_m$  decreased), or that those of BG and AP were negatively affected. As the  $Q_{10}$  of  $V_{max}$  did not differ between enzymes, this led to a higher positive temperature response of the CE of LAP. This likely contributed to the significant negative effect of higher temperatures on the  $CE^{BG:LAP}$  ratio, and shows that temperature can directly affect the relative catalytic efficiencies between C- and N-acquiring enzymes. This was consistent with previous observations suggesting that kinetic responses to temperature may vary among enzyme types, leading to changes in relative cycling of different nutrients (Allison et al., 2018). Moreover, the significant interaction between depth and

temperature on  $CE^{BG:LAP}$  ratios confirmed that their variation with depth was dependent on temperature, possibly reflecting the higher CE  $Q_{10}$  of LAP in the upper 10 cm. Higher temperatures also had a significant positive effect on  $V_{max}^{BG:AP}$  and  $V_{max}^{LAP:AP}$  ratios, indicating that AP was generally less stimulated by warming than BG or LAP. As enzyme assays at different temperatures were performed with the same soil preparations per depth and incubated over relatively short periods, these relative differences in  $V_{max}$  likely reflected a direct effect of temperature on enzyme turnover ( $K_{cat}$ ), independently of enzyme concentration. Despite the uniform temperature sensitivity of individual enzymes through the soil profile, these results show that temperature can have different effects on intrinsic kinetic properties (i.e.,  $K_m$  and  $K_{cat}$ ) of distinct enzymes in a depth-dependent manner, presumably without active microbial regulation.

## Conclusions

Kinetic and thermal properties of exoenzymes are fundamental components of complex trait spaces that allow microbes to thrive under variable nutrient availability and temperature regimes, as well as other interacting selective pressures (Allison et al., 2011; Ho et al., 2017; Malik et al., 2020; Ramin and Allison, 2019; Sinsabaugh et al., 2014; Sinsabaugh and Shah, 2012). Our results indicated that exoenzyme kinetics through the soil profile reflected, not only variation in substrate availability, but also different enzyme production levels and isozymes, which likely represent inherent traits of microbiomes with substrate and nutrient demands associated with distinct life strategies. Moreover, we show that the temperature sensitivity of exoenzymes is remarkably similar through the soil profile, but also that temperature can directly affect kinetic properties of different enzymes in a depth-dependent manner. This also implies that microbiomes at different depths produce isozymes with distinct thermal properties, which varies between enzyme types. Consequently, temperature can directly affect relative substrate depolymerization and nutrient acquisition potential, effectively decoupling enzyme relative activities from other regulatory factors, such as nutrient demand and substrate availability. Although microbial trait spaces are not static, as microbiomes adapt to changing conditions, they are likely to constrain both immediate responses and the trajectory of longer-term responses to environmental changes (Bradford, 2013; Conant et al., 2011; Xu et al., 2021). Therefore, it is essential to identify and validate key microbial traits and their environmental constraints in order to build a mechanistic understanding that can be generalized across spatiotemporal scales, and combine theory, measurements and models to improve the representation of microbial processes in Earth system models (Blankinship et al., 2018; Wieder et al., 2015). Together, our results improve the mechanistic understanding of microbial processes driving SOM dynamics as a function of soil depth and in response to warming, and provide new directions towards improved representation of key microbial traits in depth-resolved biogeochemical models.

## Data Availability Statement

Data and code generated for this study are available as Supplementary Materials, and can be found in the U.S. Department of Energy's (DOE) Environmental System Science Data Infrastructure for a Virtual Ecosystem (ESS-DIVE) (Varadharajan et al., 2019) data repository [DOI provided upon publication].

## Author Contributions

RJEA, MM and ELB conceived and designed the study. RJEA, IAC, GM and ELB collected soil samples, and RJEA, IAC, HWS and BW performed soil chemical analyses and enzyme assays. RJEA analyzed and interpreted the data with support from IAC, GM, MM and ELB. RJEA wrote the manuscript with input from MM, MST and ELB. All authors read and reviewed the manuscript.

## Funding

This work was performed at Lawrence Berkeley National Laboratory and supported by the U.S. Department of Energy Office of Science, Office of Biological and Environmental Research under Contract No. DE-AC02-05CH11231 to LBNL as part of the Belowground Biogeochemistry Science Focus Area, through the Terrestrial Ecosystem Science Program. IAC was supported by a fellowship from the National GEM Consortium. HWS was supported by the University of California, Berkeley, Sponsored Projects for Undergraduate Research Program. BW was supported by the California Alliance for Minority Participation program sponsored by the National Science Foundation.

## Conflict of Interest

The authors declare that the research was conducted in the absence of any commercial or financial relationships that could be construed as a potential conflict of interest.

## Acknowledgements

We are grateful to Xiaoqin Wu and Romy Chakraborty (Lawrence Berkeley National Laboratory) for technical support with DOC and TDN measurements. We also thank William Riley, Jinyun Tang, and the whole Belowground Biogeochemistry Scientific Focus Area team at Lawrence Berkeley National Laboratory for helpful discussions and suggestions.

## References

- Allison, S. D., Romero-Olivares, A. L., Lu, Y., Taylor, J. W., and Treseder, K. K. (2018). Temperature sensitivities of extracellular enzyme  $V_{max}$  and  $K_m$  across thermal environments. *Glob. Chang. Biol.* 24, 2884–2897. doi:10.1111/gcb.14045.
- Allison, S. D., and Treseder, K. K. (2008). Warming and drying suppress microbial activity and carbon cycling in boreal forest soils. *Glob. Chang. Biol.* 14, 2898–2909. doi:10.1111/j.1365-2486.2008.01716.x.
- Allison, S. D., and Vitousek, P. M. (2005). Responses of extracellular enzymes to simple and complex nutrient inputs. *Soil Biol. Biochem.* 37, 937–944. doi:10.1016/j.soilbio.2004.09.014.
- Allison, S. D., Weintraub, M. N., Gartner, T. B., and Waldrop, M. P. (2011). “Evolutionary-Economic Principles as Regulators of Soil Enzyme Production and Ecosystem Function,” in *Soil Enzymology*, eds. G. Shukla and A. Varma (Berlin, Heidelberg: Springer Berlin Heidelberg), 229–243. doi:10.1007/978-3-642-14225-3\_12.

- Alori, E. T., Glick, B. R., and Babalola, O. O. (2017). Microbial phosphorus solubilization and its potential for use in sustainable agriculture. *Front. Microbiol.* 8, 1–8. doi:10.3389/fmicb.2017.00971.
- Alster, C. J., Baas, P., Wallenstein, M. D., Johnson, N. G., and von Fischer, J. C. (2016a). Temperature sensitivity as a microbial trait using parameters from macromolecular rate theory. *Front. Microbiol.* 7, 1–10. doi:10.3389/fmicb.2016.01821.
- Alster, C. J., Koyama, A., Johnson, N. G., Wallenstein, M. D., and von Fischer, J. C. (2016b). Temperature sensitivity of soil microbial communities: An application of macromolecular rate theory to microbial respiration. *J. Geophys. Res. Biogeosciences* 121, 1420–1433. doi:10.1002/2016JG003343.
- Alster, C. J., von Fischer, J. C., Allison, S. D., and Treseder, K. K. (2020). Embracing a new paradigm for temperature sensitivity of soil microbes. *Glob. Chang. Biol.* 26, 3221–3229. doi:10.1111/gcb.15053.
- Alster, C. J., Weller, Z. D., and von Fischer, J. C. (2018). A meta-analysis of temperature sensitivity as a microbial trait. *Glob. Chang. Biol.* 24, 4211–4224. doi:10.1111/gcb.14342.
- Balesdent, J., Basile-Doelsch, I., Chadoeuf, J., Cornu, S., Derrien, D., Fekiacova, Z., et al. (2018). Atmosphere–soil carbon transfer as a function of soil depth. *Nature* 559, 599–602. doi:10.1038/s41586-018-0328-3.
- Berg, J. M., Tymoczko, J. L., and Stryer, L. (2002). *Biochemistry*. Fifth Ed. New York, NY: W.H. Freeman Available at: <https://books.google.com/books?id=uDFqAAAAMAAJ>.
- Blagodatskaya, E., Blagodatsky, S. A., Anderson, T. H., and Kuzyakov, Y. (2009). Contrasting effects of glucose, living roots and maize straw on microbial growth kinetics and substrate availability in soil. *Eur. J. Soil Sci.* 60, 186–197. doi:10.1111/j.1365-2389.2008.01103.x.
- Blankinship, J. C., Berhe, A. A., Crow, S. E., Druhan, J. L., Heckman, K. A., Keiluweit, M., et al. (2018). Improving understanding of soil organic matter dynamics by triangulating theories, measurements, and models. *Biogeochemistry* 140, 1–13. doi:10.1007/s10533-018-0478-2.
- Blume, E., Bischoff, M., Reichert, J. M., Moorman, T., Konopka, A., and Turco, R. F. (2002). Surface and subsurface microbial biomass, community structure and metabolic activity as a function of soil depth and season. *Appl. Soil Ecol.* 20, 171–181. doi:10.1016/S0929-1393(02)00025-2.
- Bradford, M. A. (2013). Thermal adaptation of decomposer communities in warming soils. *Front. Microbiol.* 4, 1–16. doi:10.3389/fmicb.2013.00333.
- Brewer, T. E., Aronson, E. L., Arogyaswamy, K., Billings, S. A., Botthoff, J. K., Campbell, A. N., et al. (2019). Ecological and Genomic Attributes of Novel Bacterial Taxa That Thrive in Subsurface Soil Horizons. *MBio* 10, 1–14. doi:10.1128/mBio.01318-19.
- Brookes, P. C., Landman, A., Pruden, G., and Jenkinson, D. S. (1985). Chloroform fumigation and the release of soil nitrogen: A rapid direct extraction method to measure microbial biomass nitrogen in soil. *Soil Biol. Biochem.* 17, 837–842. doi:10.1016/0038-0717(85)90144-0.
- Brzostek, E. R., and Finzi, A. C. (2012). Seasonal variation in the temperature sensitivity of

- proteolytic enzyme activity in temperate forest soils. *J. Geophys. Res. Biogeosciences* 117, 1–10. doi:10.1029/2011JG001688.
- Burnham, K. P., and Anderson, D. R. (2004). Multimodel inference: Understanding AIC and BIC in model selection. *Sociol. Methods Res.* 33, 261–304. doi:10.1177/0049124104268644.
- Burns, R. G., DeForest, J. L., Marxsen, J., Sinsabaugh, R. L., Stromberger, M. E., Wallenstein, M. D., et al. (2013). Soil enzymes in a changing environment: Current knowledge and future directions. *Soil Biol. Biochem.* 58, 216–234. doi:10.1016/j.soilbio.2012.11.009.
- Cao, P., Zhang, L. M., Shen, J. P., Zheng, Y. M., Di, H. J., and He, J. Z. (2012). Distribution and diversity of archaeal communities in selected Chinese soils. *FEMS Microbiol. Ecol.* 80, 146–158. doi:10.1111/j.1574-6941.2011.01280.x.
- Carrillo, Y., Dijkstra, F. A., LeCain, D., Blumenthal, D., and Pendall, E. (2018). Elevated CO<sub>2</sub> and warming cause interactive effects on soil carbon and shifts in carbon use by bacteria. *Ecol. Lett.* 21, 1639–1648. doi:10.1111/ele.13140.
- Cavicchioli, R., Ripple, W. J., Timmis, K. N., Azam, F., Bakken, L. R., Baylis, M., et al. (2019). Scientists' warning to humanity: microorganisms and climate change. *Nat. Rev. Microbiol.* 17, 569–586. doi:10.1038/s41579-019-0222-5.
- Chen, H., Li, D., Zhao, J., Xiao, K., and Wang, K. (2018). Effects of nitrogen addition on activities of soil nitrogen acquisition enzymes: A meta-analysis. *Agric. Ecosyst. Environ.* 252, 126–131. doi:10.1016/j.agee.2017.09.032.
- Conant, R. T., Ryan, M. G., Ågren, G. I., Birge, H. E., Davidson, E. A., Eliasson, P. E., et al. (2011). Temperature and soil organic matter decomposition rates - synthesis of current knowledge and a way forward. *Glob. Chang. Biol.* 17, 3392–3404. doi:10.1111/j.1365-2486.2011.02496.x.
- Crowther, T. W., Todd-Brown, K. E. O., Rowe, C. W., Wieder, W. R., Carey, J. C., MacHmuller, M. B., et al. (2016). Quantifying global soil carbon losses in response to warming. *Nature* 540, 104–108. doi:10.1038/nature20150.
- Darby, B. A., Goodale, C. L., Chin, N. A., Fuss, C. B., Lang, A. K., Ollinger, S. V., et al. (2020). Depth patterns and connections between gross nitrogen cycling and soil exoenzyme activities in three northern hardwood forests. *Soil Biol. Biochem.* 147, 107836. doi:10.1016/j.soilbio.2020.107836.
- Davidson, E. A., and Janssens, I. A. (2006). Temperature sensitivity of soil carbon decomposition and feedbacks to climate change. *Nature* 440, 165–173. doi:10.1038/nature04514.
- de Mendiburu, F., and Yaseen, M. (2020). agricolae: Statistical Procedures for Agricultural Research. Available at: <https://cran.r-project.org/package=agricolae>.
- Diamond, S., Andeer, P. F., Li, Z., Crits-Christoph, A., Burstein, D., Anantharaman, K., et al. (2019). Mediterranean grassland soil C–N compound turnover is dependent on rainfall and depth, and is mediated by genomically divergent microorganisms. *Nat. Microbiol.* 4, 1356–1367. doi:10.1038/s41564-019-0449-y.
- Dove, N. C., Arogyaswamy, K., Billings, S. A., Botthoff, J. K., Carey, C. J., Cisco, C., et al.

- (2020). Continental-scale patterns of extracellular enzyme activity in the subsoil: An overlooked reservoir of microbial activity. *Environ. Res. Lett.* 15, 1040a1. doi:10.1088/1748-9326/abb0b3.
- Dove, N. C., Torn, M. S., Hart, S. C., and Taş, N. (2021). Metabolic capabilities mute positive response to direct and indirect impacts of warming throughout the soil profile. *Nat. Commun.* 12, 1–13. doi:10.1038/s41467-021-22408-5.
- Dwivedi, D., Tang, J., Bouskill, N., Georgiou, K., Chacon, S. S., and Riley, W. J. (2019). Abiotic and Biotic Controls on Soil Organo–Mineral Interactions: Developing Model Structures to Analyze Why Soil Organic Matter Persists. *Rev. Mineral. Geochemistry* 85, 329–348. doi:10.2138/rmg.2019.85.11.
- Eilers, K. G., Debenport, S., Anderson, S., and Fierer, N. (2012). Digging deeper to find unique microbial communities: The strong effect of depth on the structure of bacterial and archaeal communities in soil. *Soil Biol. Biochem.* 50, 58–65. doi:10.1016/j.soilbio.2012.03.011.
- Engqvist, M. K. M. (2018). Correlating enzyme annotations with a large set of microbial growth temperatures reveals metabolic adaptations to growth at diverse temperatures. *BMC Microbiol.* 18, 177. doi:10.1186/s12866-018-1320-7.
- Fierer, N., Allen, A. S., Schimel, J. P., and Holden, P. A. (2003a). Controls on microbial CO<sub>2</sub> production: A comparison of surface and subsurface soil horizons. *Glob. Chang. Biol.* 9, 1322–1332. doi:10.1046/j.1365-2486.2003.00663.x.
- Fierer, N., Schimel, J. P., and Holden, P. A. (2003b). Variations in microbial community composition through two soil depth profiles. *Soil Biol. Biochem.* 35, 167–176. doi:10.1016/S0038-0717(02)00251-1.
- Fox, J., and Weisberg, S. (2019). *An R Companion to Applied Regression*. Third Ed. Thousand Oaks, CA: Sage Available at: <https://socialsciences.mcmaster.ca/jfox/Books/Companion/>.
- Gelsomino, A., and Azzellino, A. (2011). Multivariate analysis of soils: Microbial biomass, metabolic activity, and bacterial-community structure and their relationships with soil depth and type. *J. Plant Nutr. Soil Sci.* 174, 381–394. doi:10.1002/jpln.200900267.
- German, D. P., Chacon, S. S., and Allison, S. D. (2011a). Substrate concentration and enzyme allocation can affect rates of microbial decomposition. *Ecology* 92, 1471–1480. doi:10.1890/10-2028.1.
- German, D. P., Marcelo, K. R. B., Stone, M. M., and Allison, S. D. (2012). The Michaelis-Menten kinetics of soil extracellular enzymes in response to temperature: A cross-latitudinal study. *Glob. Chang. Biol.* 18, 1468–1479. doi:10.1111/j.1365-2486.2011.02615.x.
- German, D. P., Weintraub, M. N., Grandy, A. S., Lauber, C. L., Rinkes, Z. L., and Allison, S. D. (2011b). Optimization of hydrolytic and oxidative enzyme methods for ecosystem studies. *Soil Biol. Biochem.* 43, 1387–1397. doi:10.1016/j.soilbio.2011.03.017.
- Grant, R. F. (2013). Modelling changes in nitrogen cycling to sustain increases in forest productivity under elevated atmospheric CO<sub>2</sub> and contrasting site conditions. *Biogeosciences* 10, 7703–7721. doi:10.5194/bg-10-7703-2013.
- Gross, C. D., and Harrison, R. B. (2019). The case for digging deeper: Soil organic carbon storage, dynamics, and controls in our changing world. *Soil Syst.* 3, 1–24.



doi:10.3390/soilsystems3020028.

- Hansel, C. M., Fendorf, S., Jardine, P. M., and Francis, C. A. (2008). Changes in bacterial and archaeal community structure and functional diversity along a geochemically variable soil profile. *Appl. Environ. Microbiol.* 74, 1620–1633. doi:10.1128/AEM.01787-07.
- Hanson, P. J., Griffiths, N. A., Iversen, C. M., Norby, R. J., Sebestyén, S. D., Phillips, J. R., et al. (2020). Rapid Net Carbon Loss From a Whole-Ecosystem Warmed Peatland. *AGU Adv.* 1, e2020AV000163. doi:<https://doi.org/10.1029/2020AV000163>.
- Hartmann, M., Lee, S., Hallam, S. J., and Mohn, W. W. (2009). Bacterial, archaeal and eukaryal community structures throughout soil horizons of harvested and naturally disturbed forest stands. *Environ. Microbiol.* 11, 3045–3062. doi:10.1111/j.1462-2920.2009.02008.x.
- Heuck, C., Weig, A., and Spohn, M. (2015). Soil microbial biomass C: N: P stoichiometry and microbial use of organic phosphorus. *Soil Biol. Biochem.* 85, 119–129. doi:10.1016/j.soilbio.2015.02.029.
- Hicks Pries, C. E., Castanha, C., Porras, R. C., and Torn, M. S. (2017). The whole-soil carbon flux in response to warming. *Science* 355, 1420–1423. doi:10.1126/science.aal1319.
- Hicks Pries, C. E., Sulman, B. N., West, C., O’Neill, C., Poppleton, E., Porras, R. C., et al. (2018). Root litter decomposition slows with soil depth. *Soil Biol. Biochem.* 125, 103–114. doi:10.1016/j.soilbio.2018.07.002.
- Ho, A., Lonardo, D. P. Di, and Bodelier, P. L. E. (2017). Revisiting life strategy concepts in environmental microbial ecology. *FEMS Microbiol. Ecol.* 93, fix006. doi:10.1093/femsec/fix006.
- Hobbs, J. K., Jiao, W., Easter, A. D., Parker, E. J., Schipper, L. A., and Arcus, V. L. (2013). Change in heat capacity for enzyme catalysis determines temperature dependence of enzyme catalyzed rates. *ACS Chem. Biol.* 8, 2388–2393. doi:10.1021/cb4005029.
- Isobe, K., Allison, S. D., Khalili, B., Martiny, A. C., and Martiny, J. B. H. (2019). Phylogenetic conservation of bacterial responses to soil nitrogen addition across continents. *Nat. Commun.* 10, 1–8. doi:10.1038/s41467-019-10390-y.
- Jiang, L., Song, Y., Sun, L., Song, C., Wang, X., Ma, X., et al. (2020). Effects of warming on carbon emission and microbial abundances across different soil depths of a peatland in the permafrost region under anaerobic condition. *Appl. Soil Ecol.* 156, 103712. doi:10.1016/j.apsoil.2020.103712.
- Jiao, S., Chen, W., Wang, J., Du, N., Li, Q., and Wei, G. (2018). Soil microbiomes with distinct assemblies through vertical soil profiles drive the cycling of multiple nutrients in reforested ecosystems. *Microbiome* 6, 1–13. doi:10.1186/s40168-018-0526-0.
- Jing, X., Chen, X., Tang, M., Ding, Z., Jiang, L., Li, P., et al. (2017). Nitrogen deposition has minor effect on soil extracellular enzyme activities in six Chinese forests. *Sci. Total Environ.* 607–608, 806–815. doi:10.1016/j.scitotenv.2017.07.060.
- Jobbágy, E. G., and Jackson, R. B. (2000). The vertical distribution of soil organic carbon and its relation to climate and vegetation. *Ecol. Appl.* 10, 423–436. doi:10.1890/1051-0761(2000)010[0423:TVDOSO]2.0.CO;2.

- Jones, D. L., Magthab, E. A., Gleeson, D. B., Hill, P. W., Sánchez-Rodríguez, A. R., Roberts, P., et al. (2018). Microbial competition for nitrogen and carbon is as intense in the subsoil as in the topsoil. *Soil Biol. Biochem.* 117, 72–82. doi:10.1016/j.soilbio.2017.10.024.
- Khalili, B., Nourbakhsh, F., Nili, N., Khademi, H., and Sharifnabi, B. (2011). Diversity of soil cellulase isoenzymes is associated with soil cellulase kinetic and thermodynamic parameters. *Soil Biol. Biochem.* 43, 1639–1648. doi:10.1016/j.soilbio.2011.03.019.
- Koch, O., Tscherko, D., and Kandeler, E. (2007). Temperature sensitivity of microbial respiration, nitrogen mineralization, and potential soil enzyme activities in organic alpine soils. *Global Biogeochem. Cycles* 21, 1–11. doi:10.1029/2007GB002983.
- Köchy, M., Hiederer, R., and Freibauer, A. (2015). Global distribution of soil organic carbon – Part 1: Masses and frequency distributions of SOC stocks for the tropics, permafrost regions, wetlands, and the world. *Soil* 1, 351–365. doi:10.5194/soil-1-351-2015.
- Koshland, D. E. (2002). The application and usefulness of the ratio  $k_{cat}/K_M$ . *Bioorg. Chem.* 30, 211–213. doi:10.1006/bioo.2002.1246.
- Kramer, S., Marhan, S., Haslwimmer, H., Ruess, L., and Kandeler, E. (2013). Temporal variation in surface and subsoil abundance and function of the soil microbial community in an arable soil. *Soil Biol. Biochem.* 61, 76–85. doi:10.1016/j.soilbio.2013.02.006.
- Kujur, M., and Kumar Patel, A. (2014). Kinetics of soil enzyme activities under different ecosystems: An index of soil quality. *Chil. J. Agric. Res.* 74, 96–104. doi:10.4067/S0718-58392014000100015.
- Lax, S., Abreu, C. I., and Gore, J. (2020). Higher temperatures generically favour slower-growing bacterial species in multispecies communities. *Nat. Ecol. Evol.* 4, 560–567. doi:10.1038/s41559-020-1126-5.
- Liu, N., Hu, H., Ma, W., Deng, Y., Liu, Y., Hao, B., et al. (2019). Contrasting Biogeographic Patterns of Bacterial and Archaeal Diversity in the Top- and Subsoils of Temperate Grasslands. *mSystems* 4, 1–18. doi:10.1128/msystems.00566-19.
- Loeppmann, S., Blagodatskaya, E., Pausch, J., and Kuzyakov, Y. (2016a). Enzyme properties down the soil profile - A matter of substrate quality in rhizosphere and detritosphere. *Soil Biol. Biochem.* 103, 274–283. doi:10.1016/j.soilbio.2016.08.023.
- Loeppmann, S., Blagodatskaya, E., Pausch, J., and Kuzyakov, Y. (2016b). Substrate quality affects kinetics and catalytic efficiency of exo-enzymes in rhizosphere and detritosphere. *Soil Biol. Biochem.* 92, 111–118. doi:10.1016/j.soilbio.2015.09.020.
- Malik, A. A., Martiny, J. B. H., Brodie, E. L., Martiny, A. C., Treseder, K. K., and Allison, S. D. (2020). Defining trait-based microbial strategies with consequences for soil carbon cycling under climate change. *ISME J.* 14, 1–9. doi:10.1038/s41396-019-0510-0.
- Mazerolle, M. J. (2020). AICcmodavg: Model selection and multimodel inference based on (Q)AIC(c). Available at: <https://cran.r-project.org/package=AICcmodavg>.
- Mooshammer, M., Wanek, W., Zechmeister-Boltenstern, S., and Richter, A. (2014). Stoichiometric imbalances between terrestrial decomposer communities and their resources: Mechanisms and implications of microbial adaptations to their resources. *Front. Microbiol.* 5, 1–10. doi:10.3389/fmicb.2014.00022.

- Moscatelli, M. C., Lagomarsino, A., Garzillo, A. M. V., Pignataro, A., and Grego, S. (2012).  $\beta$ -Glucosidase kinetic parameters as indicators of soil quality under conventional and organic cropping systems applying two analytical approaches. *Ecol. Indic.* 13, 322–327. doi:10.1016/j.ecolind.2011.06.031.
- Nannipieri, P., Giagnoni, L., Renella, G., Puglisi, E., Ceccanti, B., Masciandaro, G., et al. (2012). Soil enzymology: Classical and molecular approaches. *Biol. Fertil. Soils* 48, 743–762. doi:10.1007/s00374-012-0723-0.
- Ni, X., Liao, S., Tan, S., Peng, Y., Wang, D., Yue, K., et al. (2020). The vertical distribution and control of microbial necromass carbon in forest soils. *Glob. Ecol. Biogeogr.* 29, 1829–1839. doi:10.1111/geb.13159.
- Nottingham, A. T., Meir, P., Velasquez, E., and Turner, B. L. (2020). Soil carbon loss by experimental warming in a tropical forest. *Nature* 584, 234–237. doi:10.1038/s41586-020-2566-4.
- Nottingham, A. T., Turner, B. L., Whitaker, J., Ostle, N., Bardgett, R. D., McNamara, N. P., et al. (2016). Temperature sensitivity of soil enzymes along an elevation gradient in the Peruvian Andes. *Biogeochemistry* 127, 217–230. doi:10.1007/s10533-015-0176-2.
- Nuccio, E. E., Starr, E., Karaoz, U., Brodie, E. L., Zhou, J., Tringe, S. G., et al. (2020). Niche differentiation is spatially and temporally regulated in the rhizosphere. *ISME J.* 14, 999–1014. doi:10.1038/s41396-019-0582-x.
- Nunan, N., Schmidt, H., and Raynaud, X. (2020). The ecology of heterogeneity: Soil bacterial communities and C dynamics. *Philos. Trans. R. Soc. B Biol. Sci.* 375, 20190249. doi:10.1098/rstb.2019.0249.
- Pasut, C., Tang, F. H. M., Hamilton, D., Riley, W. J., and Maggi, F. (2021). Spatiotemporal Assessment of GHG Emissions and Nutrient Sequestration Linked to Agronutrient Runoff in Global Wetlands. *Global Biogeochem. Cycles* 35, e2020GB006816. doi:10.1029/2020GB006816.
- Perucci, P. (1992). Enzyme activity and microbial biomass in a field soil amended with municipal refuse. *Biol. Fertil. Soils* 14, 54–60. doi:10.1007/BF00336303.
- R Core Team (2020). R: A Language and Environment for Statistical Computing. Available at: <https://www.r-project.org/>.
- Ramin, K. I., and Allison, S. D. (2019). Bacterial Tradeoffs in Growth Rate and Extracellular Enzymes. *Front. Microbiol.* 10, 1–10. doi:10.3389/fmicb.2019.02956.
- Razavi, B. S., Blagodatskaya, E., and Kuzyakov, Y. (2015). Nonlinear temperature sensitivity of enzyme kinetics explains canceling effect - A case study on loamy haplic Luvisol. *Front. Microbiol.* 6, 1–13. doi:10.3389/fmicb.2015.01126.
- Razavi, B. S., Blagodatskaya, E., and Kuzyakov, Y. (2016). Temperature selects for static soil enzyme systems to maintain high catalytic efficiency. *Soil Biol. Biochem.* 97, 15–22. doi:10.1016/j.soilbio.2016.02.018.
- Ren, Q., Song, H., Yuan, Z., Ni, X., and Li, C. (2018). Changes in soil enzyme activities and microbial biomass after revegetation in the Three Gorges Reservoir, China. *Forests* 9, 249. doi:10.3390/f9050249.

- Ritz, C., Baty, F., Streibig, J. C., and Gerhard, D. (2015). Dose-response analysis using R. *PLoS One* 10, e0146021. doi:10.1371/journal.pone.0146021.
- Robinson, J. M., O'Neill, T. A., Ryburn, J., Liang, L. L., Arcus, V. L., and Schipper, L. A. (2017). Rapid laboratory measurement of the temperature dependence of soil respiration and application to changes in three diverse soils through the year. *Biogeochemistry* 133, 101–112. doi:10.1007/s10533-017-0314-0.
- Rumpel, C., and Kögel-Knabner, I. (2011). Deep soil organic matter—a key but poorly understood component of terrestrial C cycle. *Plant Soil* 338, 143–158. doi:10.1007/s11104-010-0391-5.
- Salomé, C., Nunan, N., Pouteau, V., Lerch, T. Z., and Chenu, C. (2010). Carbon dynamics in topsoil and in subsoil may be controlled by different regulatory mechanisms. *Glob. Chang. Biol.* 16, 416–426. doi:10.1111/j.1365-2486.2009.01884.x.
- Schipper, L. A., Hobbs, J. K., Rutledge, S., and Arcus, V. L. (2014). Thermodynamic theory explains the temperature optima of soil microbial processes and high Q10 values at low temperatures. *Glob. Chang. Biol.* 20, 3578–3586. doi:10.1111/gcb.12596.
- Schnecker, J., Wild, B., Hofhansl, F., Alves, R. J. E., Bárta, J., Čapek, P., et al. (2014). Effects of Soil Organic Matter Properties and Microbial Community Composition on Enzyme Activities in Cryoturbated Arctic Soils. *PLoS One* 9, e94076. doi:10.1371/journal.pone.0094076.
- Schnecker, J., Wild, B., Takriti, M., Alves, R. J. E., Gentsch, N., Gittel, A., et al. (2015). Microbial community composition shapes enzyme patterns in topsoil and subsoil horizons along a latitudinal transect in Western Siberia. *Soil Biol. Biochem.* 83, 106–115. doi:10.1016/j.soilbio.2015.01.016.
- Sinsabaugh, R. L., Belnap, J., Findlay, S. G., Shah, J. J. F., Hill, B. H., Kuehn, K. A., et al. (2014). Extracellular enzyme kinetics scale with resource availability. *Biogeochemistry* 121, 287–304. doi:10.1007/s10533-014-0030-y.
- Sinsabaugh, R. L., and Shah, J. J. F. (2012). Ecoenzymatic stoichiometry and ecological theory. *Annu. Rev. Ecol. Evol. Syst.* 43, 313–343. doi:10.1146/annurev-ecolsys-071112-124414.
- Somero, G. N. (2004). Adaptation of enzymes to temperature: searching for basic “strategies.” *Comp. Biochem. Physiol. Part B Biochem. Mol. Biol.* 139, 321–333. doi:10.1016/j.cbpc.2004.05.003.
- Soong, J. L., Castanha, C., Hicks Pries, C. E., Ofiti, N., Porras, R. C., Riley, W. J., et al. (2021). Five years of whole-soil warming led to loss of subsoil carbon stocks and increased CO<sub>2</sub> efflux. *Sci. Adv.* 7, eabd1343. doi:10.1126/sciadv.abd1343.
- Soong, J. L., Phillips, C. L., Ledna, C., Koven, C. D., and Torn, M. S. (2020). CMIP5 Models Predict Rapid and Deep Soil Warming Over the 21st Century. *J. Geophys. Res. Biogeosciences* 125. doi:10.1029/2019JG005266.
- Steinweg, J. M., Jagadamma, S., Frerichs, J., and Mayes, M. A. (2013). Activation Energy of Extracellular Enzymes in Soils from Different Biomes. *PLoS One* 8, e59943. doi:10.1371/journal.pone.0059943.
- Stone, M. M., DeForest, J. L., and Plante, A. F. (2014). Changes in extracellular enzyme activity and microbial community structure with soil depth at the Luquillo Critical Zone

- Observatory. *Soil Biol. Biochem.* 75, 237–247. doi:10.1016/j.soilbio.2014.04.017.
- Stone, M. M., Weiss, M. S., Goodale, C. L., Adams, M. B., Fernandez, I. J., German, D. P., et al. (2012). Temperature sensitivity of soil enzyme kinetics under N-fertilization in two temperate forests. *Glob. Chang. Biol.* 18, 1173–1184. doi:10.1111/j.1365-2486.2011.02545.x.
- Struvay, C., and Feller, G. (2012). Optimization to low temperature activity in psychrophilic enzymes. *Int. J. Mol. Sci.* 13, 11643–11665. doi:10.3390/ijms130911643.
- Sulman, B. N., Phillips, R. P., Oishi, A. C., Shevliakova, E., and Pacala, S. W. (2014). Microbe-driven turnover offsets mineral-mediated storage of soil carbon under elevated CO<sub>2</sub>. *Nat. Clim. Chang.* 4, 1099–1102. doi:10.1038/nclimate2436.
- Tang, J., and Riley, W. J. (2015). Weaker soil carbon-climate feedbacks resulting from microbial and abiotic interactions. *Nat. Clim. Chang.* 5, 56–60. doi:10.1038/nclimate2438.
- Tang, J., and Riley, W. J. (2019). Competitor and substrate sizes and diffusion together define enzymatic depolymerization and microbial substrate uptake rates. *Soil Biol. Biochem.* 139, 107624. doi:10.1016/j.soilbio.2019.107624.
- Taylor, J. P., Wilson, B., Mills, M. S., and Burns, R. G. (2002). Comparison of microbial numbers and enzymatic activities in surface soils and subsoils using various techniques. *Soil Biol. Biochem.* 34, 387–401. doi:10.1016/S0038-0717(01)00199-7.
- Tian, P., Razavi, B. S., Zhang, X., Wang, Q., and Blagodatskaya, E. (2020). Microbial growth and enzyme kinetics in rhizosphere hotspots are modulated by soil organics and nutrient availability. *Soil Biol. Biochem.* 141, 107662. doi:10.1016/j.soilbio.2019.107662.
- Tischer, A., Blagodatskaya, E., and Hamer, U. (2015). Microbial community structure and resource availability drive the catalytic efficiency of soil enzymes under land-use change conditions. *Soil Biol. Biochem.* 89, 226–237. doi:10.1016/j.soilbio.2015.07.011.
- Trasar-Cepeda, C., Gil-Sotres, F., and Leirós, M. C. (2007). Thermodynamic parameters of enzymes in grassland soils from Galicia, NW Spain. *Soil Biol. Biochem.* 39, 311–319. doi:10.1016/j.soilbio.2006.08.002.
- Triebwasser-Freese, D. J., Tharayil, N., Preston, C. M., and Gerard, P. G. (2015). Catalytic kinetics and activation energy of soil peroxidases across ecosystems of differing lignin chemistries. *Biogeochemistry* 124, 113–129. doi:10.1007/s10533-015-0086-3.
- Trumbore, S. (2000). Age of soil organic matter and soil respiration: Radiocarbon constraints on belowground C dynamics. *Ecol. Appl.* 10, 399–411. doi:10.1890/1051-0761(2000)010[0399:AOSOMA]2.0.CO;2.
- Trumbore, S. (2009). Radiocarbon and soil carbon dynamics. *Annu. Rev. Earth Planet. Sci.* 37, 47–66. doi:10.1146/annurev.earth.36.031207.124300.
- Turner, S., Mikutta, R., Meyer-Stüve, S., Guggenberger, G., Schaarschmidt, F., Lazar, C. S., et al. (2017). Microbial Community Dynamics in Soil Depth Profiles Over 120,000 Years of Ecosystem Development. *Front. Microbiol.* 8, 1–17. doi:10.3389/fmicb.2017.00874.
- Van Gestel, N., Shi, Z., Van Groenigen, K. J., Osenberg, C. W., Andresen, L. C., Dukes, J. S., et al. (2018). Predicting soil carbon loss with warming. *Nature* 554, E4–E5.

doi:10.1038/nature25745.

- Varadharajan, C., Cholia, S., Snavely, C., Hendrix, V., Procopiou, C., Swantek, D., et al. (2019). Launching an Accessible Archive of Environmental Data. *Eos (Washington, DC)*. 100, 1–10. doi:10.1029/2019eo111263.
- Venkatesan, S., and Senthurpandian, V. K. (2006). Comparison of enzyme activity with depth under tea plantations and forested sites in south India. *Geoderma* 137, 212–216. doi:10.1016/j.geoderma.2006.08.011.
- Wallenstein, M., Allison, S. D., Ernakovich, J., Steinweg, J. M., and Sinsabaugh, R. L. (2011). “Controls on the Temperature Sensitivity of Soil Enzymes: A Key Driver of In Situ Enzyme Activity Rates,” in *Soil Enzymology*, eds. G. Shukla and A. Varma (Berlin, Heidelberg: Springer Berlin Heidelberg), 245–258. doi:10.1007/978-3-642-14225-3\_13.
- Wang, B., and Allison, S. D. (2019). Emergent properties of organic matter decomposition by soil enzymes. *Soil Biol. Biochem.* 136, 107522. doi:10.1016/j.soilbio.2019.107522.
- Wang, G., Jagadamma, S., Mayes, M. A., Schadt, C. W., Steinweg, J. M., Gu, L., et al. (2015). Microbial dormancy improves development and experimental validation of ecosystem model. *ISME J.* 9, 226–37. doi:10.1038/ismej.2014.120.
- Wang, Y., Zhang, H., Ciais, P., Goll, D., Huang, Y., Wood, J. D., et al. (2021). Microbial Activity and Root Carbon Inputs Are More Important than Soil Carbon Diffusion in Simulating Soil Carbon Profiles. *J. Geophys. Res. Biogeosciences* 126, 1–19. doi:10.1029/2020JG006205.
- Waring, B. G., Weintraub, S. R., and Sinsabaugh, R. L. (2014). Ecoenzymatic stoichiometry of microbial nutrient acquisition in tropical soils. *Biogeochemistry* 117, 101–113. doi:10.1007/s10533-013-9849-x.
- Wieder, W. R., Allison, S. D., Davidson, E. A., Georgiou, K., Hararuk, O., He, Y., et al. (2015). Explicitly representing soil microbial processes in Earth system models. *Global Biogeochem. Cycles* 29, 1782–1800. doi:10.1002/2015GB005188.
- Wieder, W. R., Grandy, A. S., Kallenbach, C. M., and Bonan, G. B. (2014). Integrating microbial physiology and physio-chemical principles in soils with the MIMICS model. *Biogeosciences* 11, 3899–3917. doi:10.5194/bg-11-3899-2014.
- Wilke, C. O. (2020). cowplot: Streamlined Plot Theme and Plot Annotations for “ggplot2.” Available at: <https://cran.r-project.org/package=cowplot>.
- Xu, M., Li, X., Kuyper, T. W., Xu, M., Li, X., and Zhang, J. (2021). High microbial diversity stabilizes the responses of soil organic carbon decomposition to warming in the subsoil on the Tibetan Plateau. *Glob. Chang. Biol.* 27, 2061–2075. doi:10.1111/gcb.15553.
- Yan, H., Yang, F., Gao, J., Peng, Z., and Chen, W. (2019). Subsoil microbial community responses to air exposure and legume growth depend on soil properties across different depths. *Sci. Rep.* 9, 1–11. doi:10.1038/s41598-019-55089-8.
- Zosso, C., Ofiti, N., Soong, J. L., Solly, E., Torn, M. S., Huguet, A., et al. (2021). Whole soil warming decreases abundance and modifies community structure of microorganisms in subsoil but not in surface soil. *SOIL Discuss.* 2021, 1–30. doi:10.5194/soil-2021-14.

## Tables

**Table 1.** Experimental set-up of enzyme potential activity assays.

| Enzyme                                      | Fluorogenic substrate                            | Substrate concentration ( $\mu\text{M}$ ) | Soil depth (cm) | Temperature ( $^{\circ}\text{C}$ ) | Incubation time (h) |
|---------------------------------------------|--------------------------------------------------|-------------------------------------------|-----------------|------------------------------------|---------------------|
| $\beta$ -glucosidase (BG)<br>EC 3.2.1.21    | 4-methylumbelliferyl- $\beta$ -D-glucopyranoside | 10, 30, 60, 100, 150, 250, 450, 800       | 0-10            | 4                                  | 2                   |
|                                             |                                                  |                                           | 10-20           | 10                                 | 4                   |
| Leucine aminopeptidase (LAP)<br>EC 3.4.11.1 | L-leucine-7-amido-4-methylcoumarin               | 10, 20, 40, 70, 110, 190, 350, 600        | 30-40           | 16                                 | 24                  |
|                                             |                                                  |                                           | 50-60           | 25                                 |                     |
| Acid Phosphatase (AP)<br>EC 3.1.3.2         | 4-methylumbelliferyl phosphate                   | 10, 40, 80, 130, 200, 350, 700, 1200      | 60-70           | 35                                 |                     |
|                                             |                                                  |                                           | 80-90           | 50                                 |                     |

**Table 2.** Two-way fixed effects ANOVA of kinetic parameters with depth, with depth and temperature as independent factors. Differences were considered significant at  $p < 0.05$

| Enzyme | Factor              | $V_{\max}/ds$ |         |         | $V_{\max}/MBC$ |         |         | $K_m$ |         |         | $CE_{ds}$ |         |         | $CE_{MBC}$ |         |         |
|--------|---------------------|---------------|---------|---------|----------------|---------|---------|-------|---------|---------|-----------|---------|---------|------------|---------|---------|
|        |                     | Df            | F value | p value | Df             | F value | p value | Df    | F value | p value | Df        | F value | p value | Df         | F value | p value |
| BG     | Depth               | 5             | 89.32   | < 0.05  | 5              | 100.95  | < 0.05  | 5     | 30.03   | < 0.05  | 5         | 45.42   | < 0.05  | 5          | 27.37   | < 0.05  |
|        | Temperature         | 5             | 19.94   | < 0.05  | 5              | 54.16   | < 0.05  | 5     | 2.64    | 0.03    | 5         | 14.55   | < 0.05  | 5          | 28.54   | < 0.05  |
|        | Depth × Temperature | 25            | 0.09    | 1.00    | 25             | 0.25    | 1.00    | 25    | 1.52    | 0.09    | 25        | 0.9     | 0.61    | 25         | 1.61    | 0.06    |
| LAP    | Depth               | 5             | 127.92  | < 0.05  | 5              | 64.27   | < 0.05  | 5     | 20.94   | < 0.05  | 5         | 77.8    | < 0.05  | 5          | 30.97   | < 0.05  |
|        | Temperature         | 5             | 27.69   | < 0.05  | 5              | 29.61   | < 0.05  | 5     | 1.52    | 0.19    | 5         | 51.05   | < 0.05  | 5          | 69.4    | < 0.05  |
|        | Depth × Temperature | 25            | 0.32    | 0.99    | 25             | 0.33    | 0.99    | 25    | 0.56    | 0.95    | 25        | 0.18    | 1.00    | 25         | 0.19    | 1.00    |
| AP     | Depth               | 5             | 44.43   | < 0.05  | 5              | 29.08   | < 0.05  | 5     | 25.22   | < 0.05  | 5         | 3.2     | 0.01    | 5          | 1.47    | 0.212   |
|        | Temperature         | 5             | 9.72    | < 0.05  | 5              | 20.23   | < 0.05  | 5     | 1.53    | 0.19    | 5         | 7.61    | < 0.05  | 5          | 14.31   | < 0.05  |
|        | Depth × Temperature | 25            | 0.15    | 1.00    | 25             | 0.26    | 1.00    | 25    | 0.32    | 0.99    | 25        | 0.09    | 1.00    | 25         | 0.15    | 1.00    |



**Table 3.** One-way ANOVA of temperature sensitivity estimates with depth.  $Q_{10}$  values were calculated between 4-35°C, and the MMRT model parameters  $T_{opt}$ ,  $TS_{max}$ , and  $\Delta C_p^\ddagger$  between 4-50°C. Differences were considered significant at  $p < 0.05$ .

| Enzyme | $V_{max} Q_{10}$ |         |         | $K_m Q_{10}$ |         |         | CE $Q_{10}$ |         |         | $T_{opt}$ |         |         | $TS_{max}$ |         |         | $\Delta C_p^\ddagger$ |         |         |
|--------|------------------|---------|---------|--------------|---------|---------|-------------|---------|---------|-----------|---------|---------|------------|---------|---------|-----------------------|---------|---------|
|        | Df               | F value | p value | Df           | F value | p value | Df          | F value | p value | Df        | F value | p value | Df         | F value | p value | Df                    | F value | p value |
| BG     | 5                | 0.81    | 0.56    | 5            | 1.71    | 0.21    | 5           | 1.00    | 0.46    | 5         | 0.66    | 0.67    | 5          | 0.72    | 0.62    | 5                     | 0.84    | 0.56    |
| LAP    | 5                | 1.59    | 0.24    | 5            | 1.08    | 0.42    | 5           | 0.73    | 0.62    | 5         | 0.80    | 0.57    | 5          | 3.63    | 0.03    | 5                     | 0.80    | 0.57    |
| AP     | 5                | 1.71    | 0.21    | 5            | 0.79    | 0.58    | 5           | 0.71    | 0.63    | 5         | 1.98    | 0.16    | 5          | 1.92    | 0.17    | 5                     | 1.25    | 0.35    |

## Figures

**Figure 1.** Enzyme maximum velocity ( $V_{\max}$ ) at different depths and six temperatures from 4 to 50°C, expressed per (A) dry soil mass ( $V_{\max/\text{ds}}$ ), or (B) microbial biomass C ( $V_{\max/\text{MBC}}$ ). Colors indicate incubation temperatures and letters indicate significant differences ( $p < 0.05$ ) between depths, per enzyme. Significance is based on Tukey's tests after two-way ANOVA with depth and temperature as interactive factors (Table 2). Error bars represent the standard error of the mean ( $n = 3$ ).

**Figure 2.** Enzyme Michaelis constant ( $K_m$ ) at different depths and six temperatures from 4 to 50°C. Colors indicate incubation temperatures and letters indicate significant differences ( $p < 0.05$ ) between depths, per enzyme. Significance is based on Tukey's tests after two-way ANOVA with depth and temperature as interactive factors (Table 2). Error bars represent the standard error of the mean ( $n = 3$ ).

**Figure 3.** Enzyme catalytic efficiency at different depths and six temperatures from 4 to 50°C, calculated on a (A) dry soil mass basis ( $\text{CE}_{\text{ds}}$ ), or a (B) microbial biomass C basis ( $\text{CE}_{\text{MBC}}$ ). Colors indicate incubation temperatures and letters indicate significant differences ( $p < 0.05$ ) between depths, per enzyme. Significance is based on Tukey's tests after two-way ANOVA with depth and temperature as interactive factors (Table 2). Error bars represent the standard error of the mean ( $n = 3$ ).

**Figure 4.** Ratios between kinetic parameters of BG, LAP and AP at different depths and six temperatures from 4 to 50°C. (A)  $V_{\max}^{\text{BG:LAP}}$ , (B)  $V_{\max}^{\text{BG:AP}}$ , (C)  $V_{\max}^{\text{LAP:AP}}$ , (D)  $K_m^{\text{BG:LAP}}$ , (E)  $K_m^{\text{BG:AP}}$ , (F)  $K_m^{\text{LAP:AP}}$ , (G)  $\text{CE}^{\text{BG:LAP}}$ , (H)  $\text{CE}^{\text{BG:AP}}$ , and (I)  $\text{CE}^{\text{LAP:AP}}$ . Colors indicate incubation temperatures and letters indicate significant differences ( $p < 0.05$ ) between depths, per ratio. Significance is based on Tukey's tests after two-way ANOVA with depth and temperature as interactive factors (Table S5). Error bars represent the standard error of the mean ( $n = 3$ ); dots without error bars represent data-points with  $n < 3$  (data excluded due to Michaelis-Menten models with poor fit).

**Figure 5.** Arrhenius models of  $V_{\max}$  over five temperatures from 4 to 35°C per enzyme, depth and replicate core sample.

**Figure 6.** MMRT models of  $V_{\max}$  over six temperatures from 4 to 50°C per enzyme, depth and replicate core sample.

**Figure 7.**  $Q_{10}$  of Michaelis-Menten kinetic parameters over five temperatures from 4 to 35°C at different depths. (A)  $V_{\max}$ , (B)  $K_m$ , and (C) CE. Differences between depths are not significant ( $p > 0.05$ ), based on ANOVA per enzyme (Table 3). Error bars represent the standard error of the mean ( $n = 3$ ).

**Figure 8.** MMRT model estimates over six temperatures from 4 to 50°C at different depths. (A)  $T_{\text{opt}}$ , (B)  $TS_{\max}$ , and (C)  $\Delta C_p^\ddagger$ . Differences between depths are not significant ( $p > 0.05$ ), based on ANOVA per enzyme (Table 3), except for  $TS_{\max}$  of LAP between the depths indicated by asterisks (\*). Error bars represent the standard error of the mean ( $n = 3$ ).

**Figure 1**

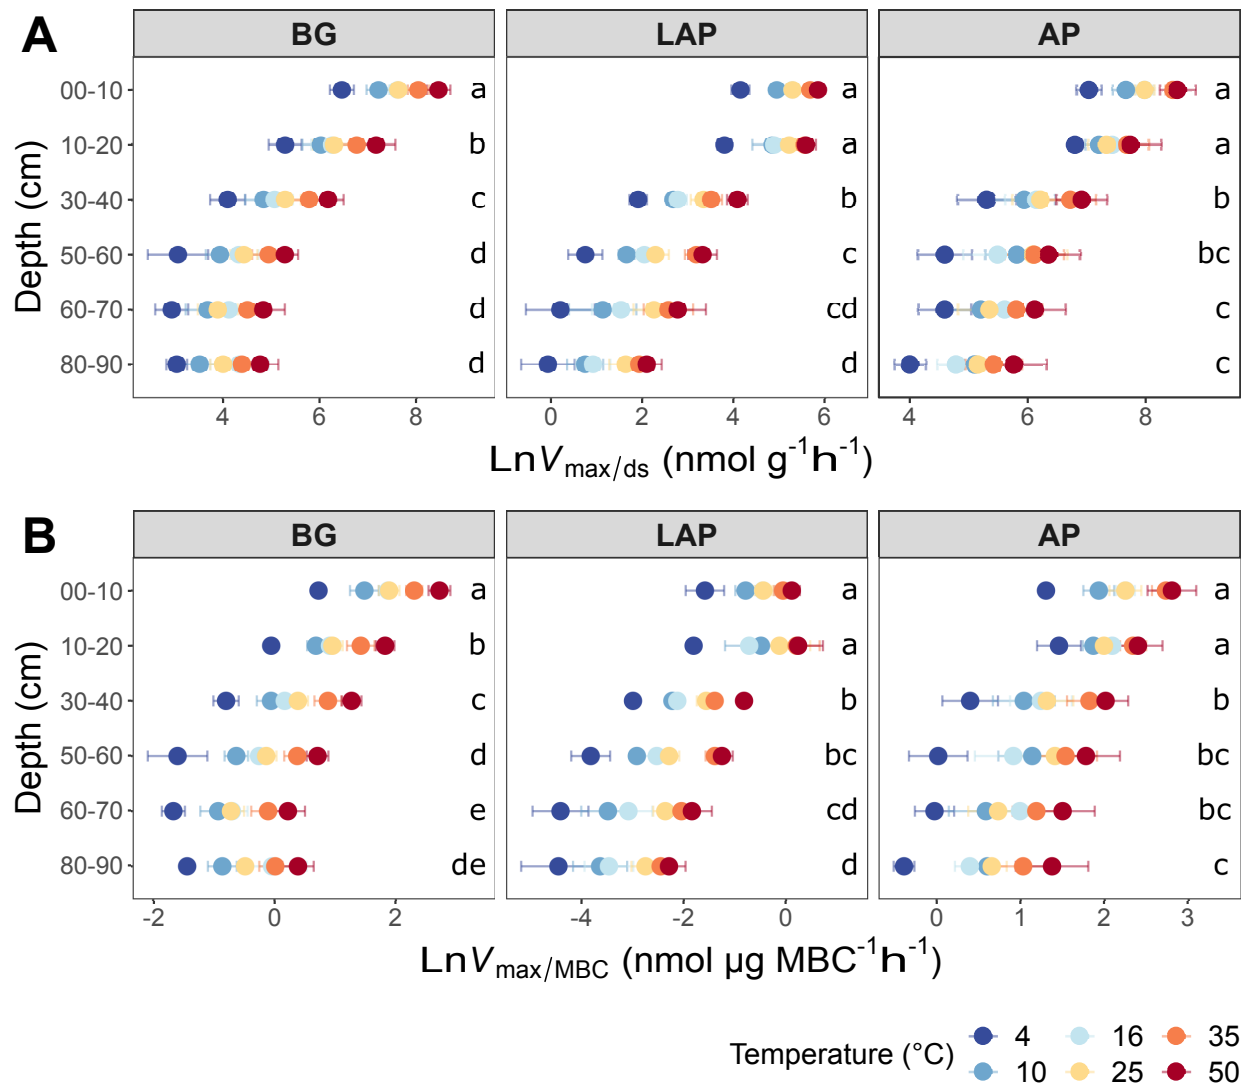

Figure 2

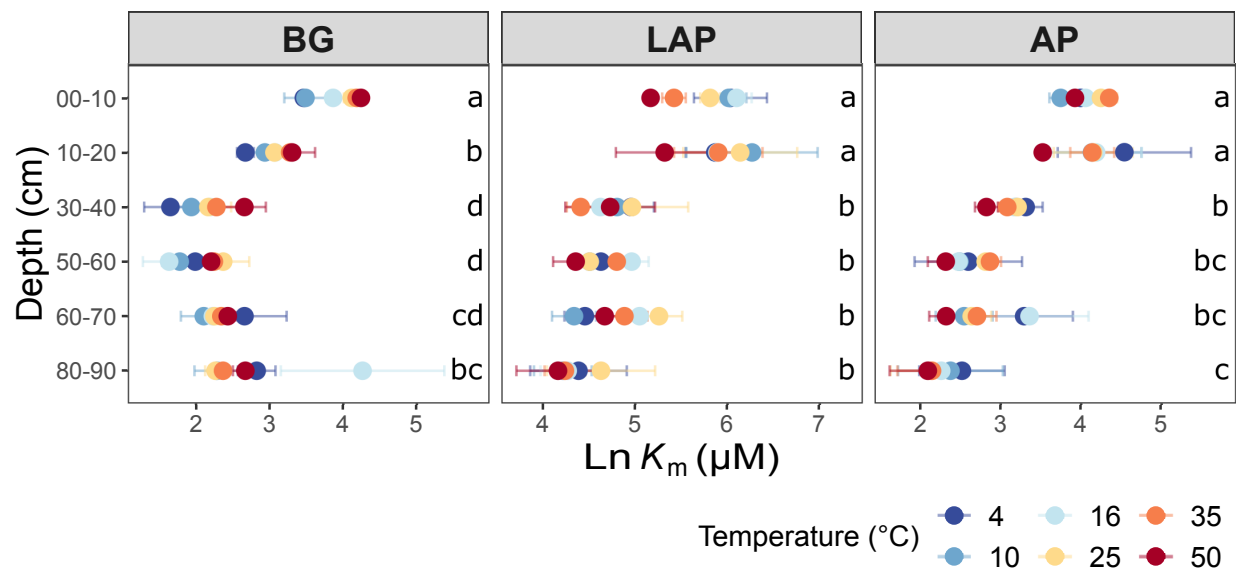

**Figure 3**

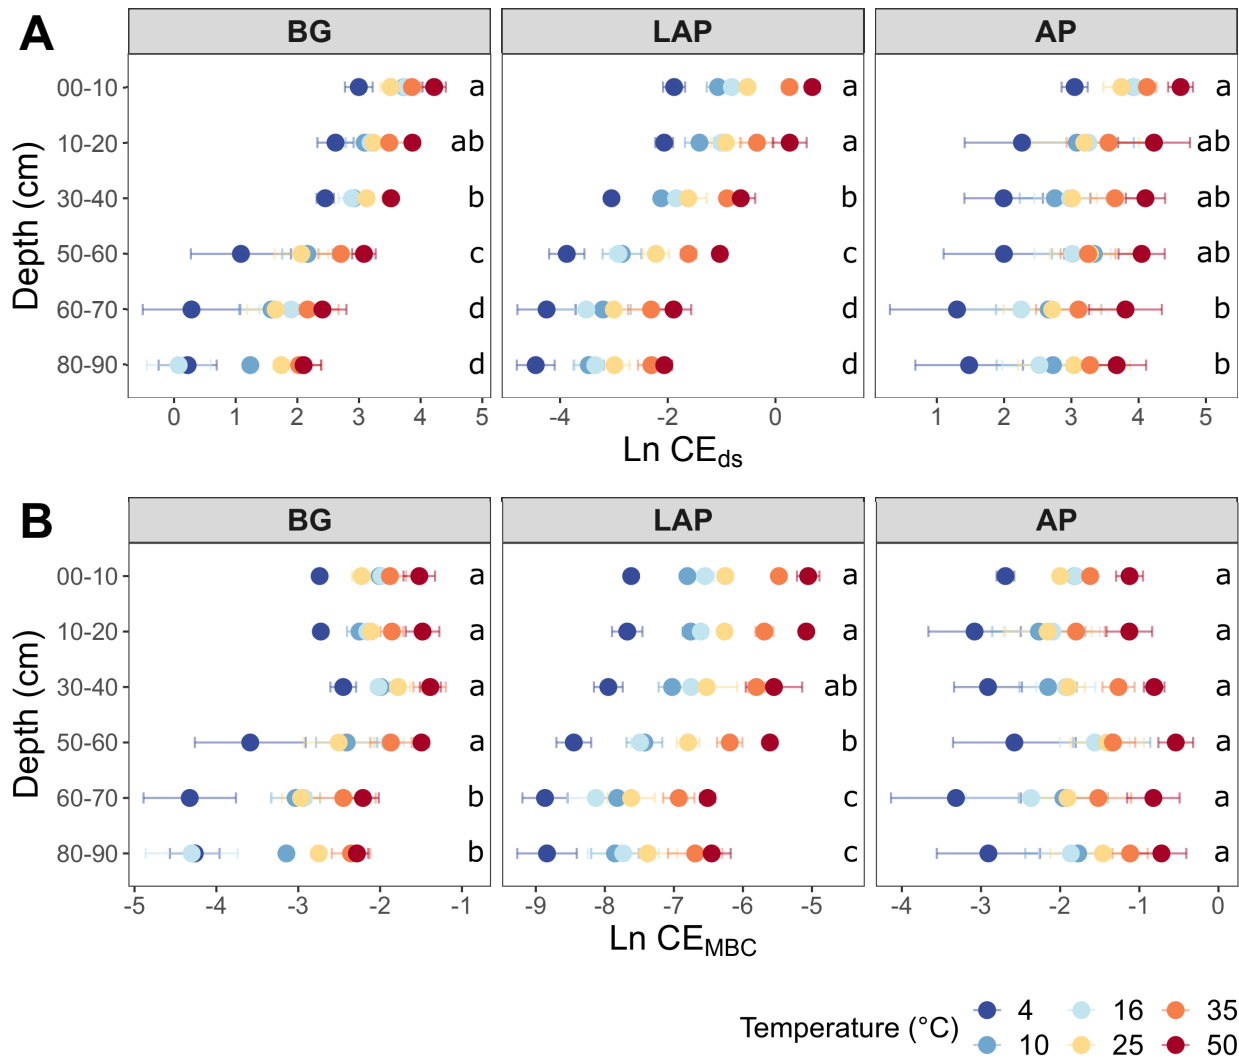

**Figure 4**

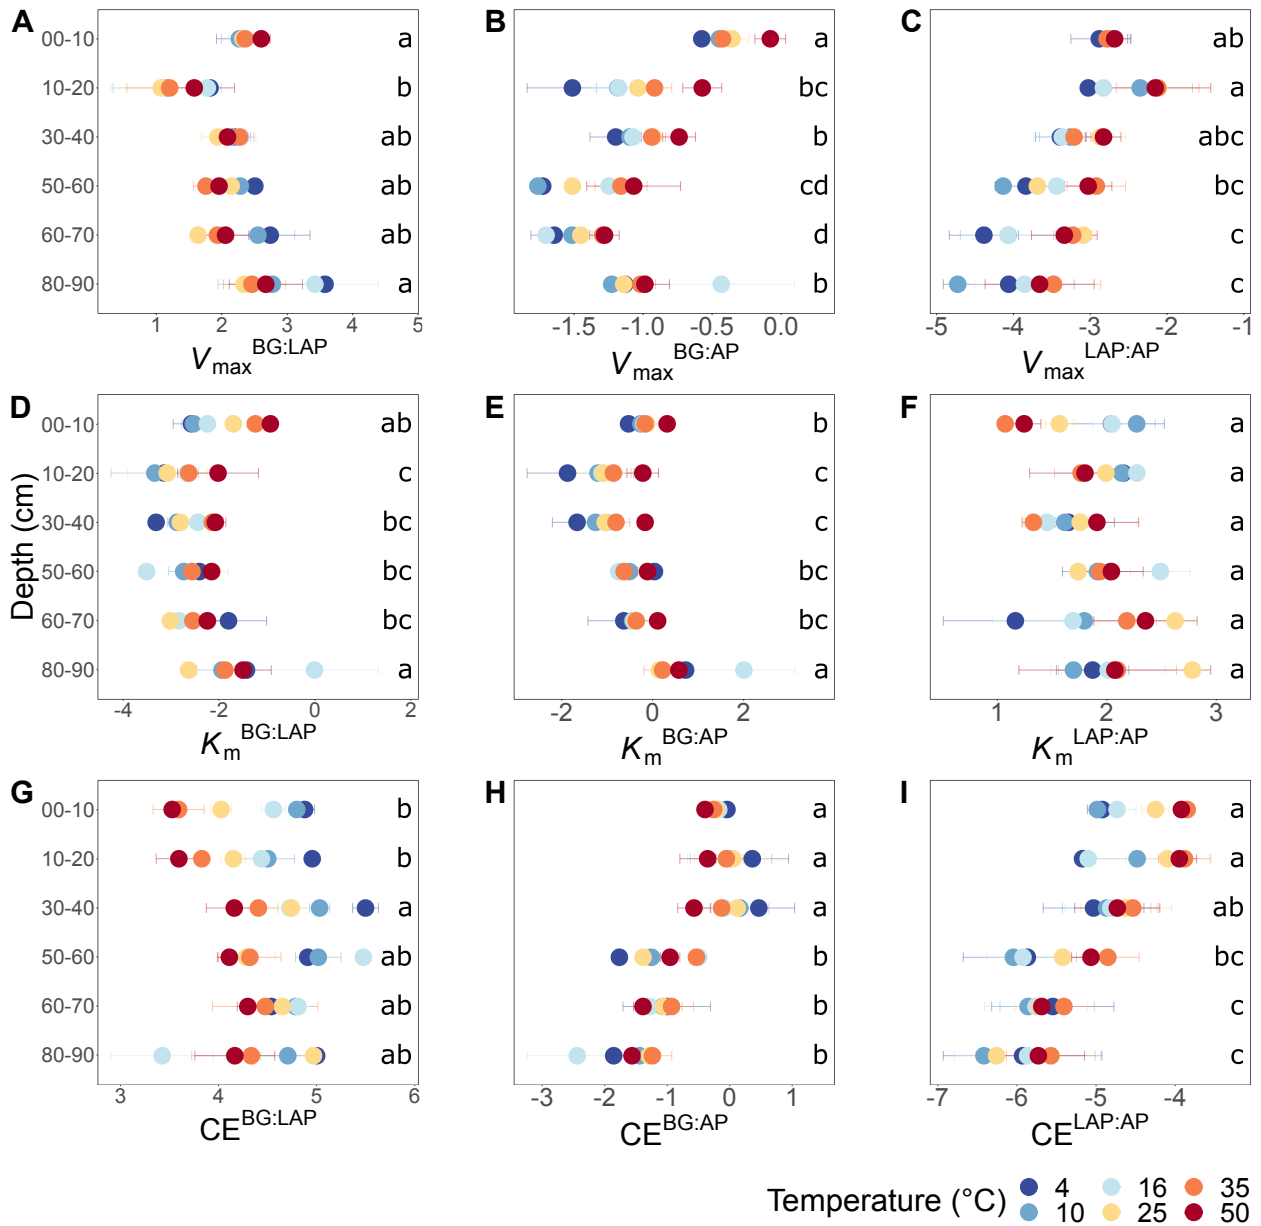

Figure 5

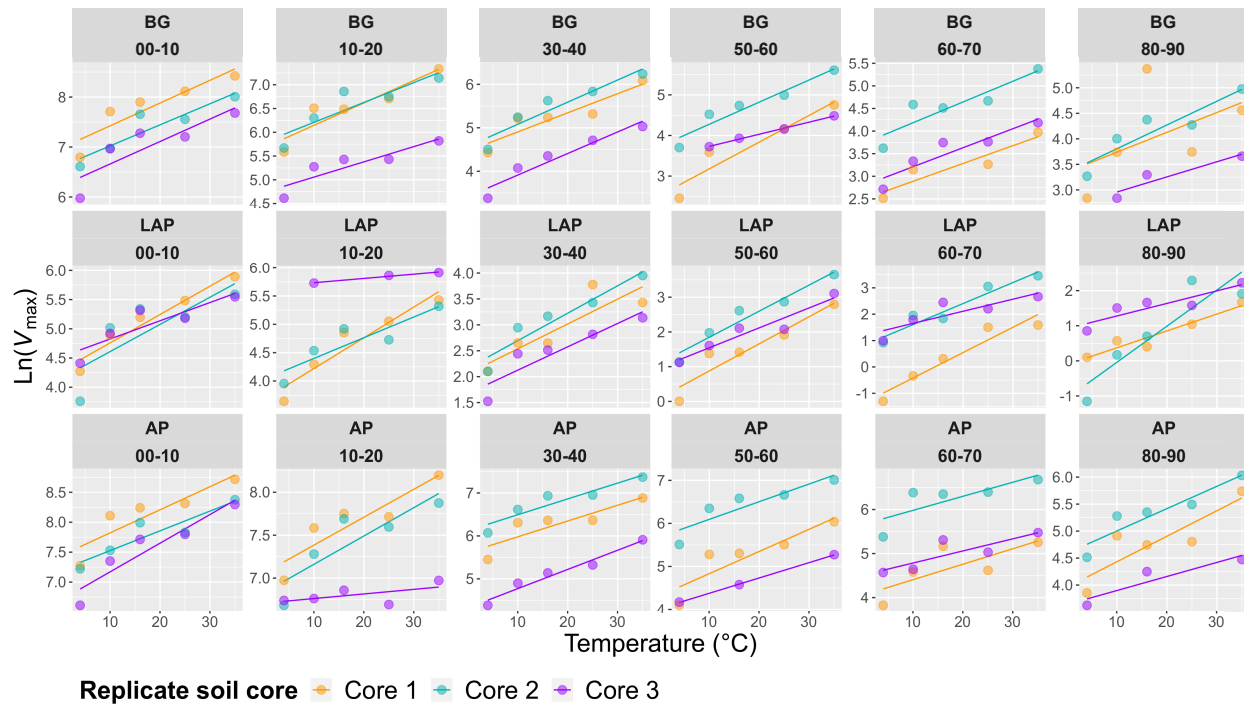



Figure 6

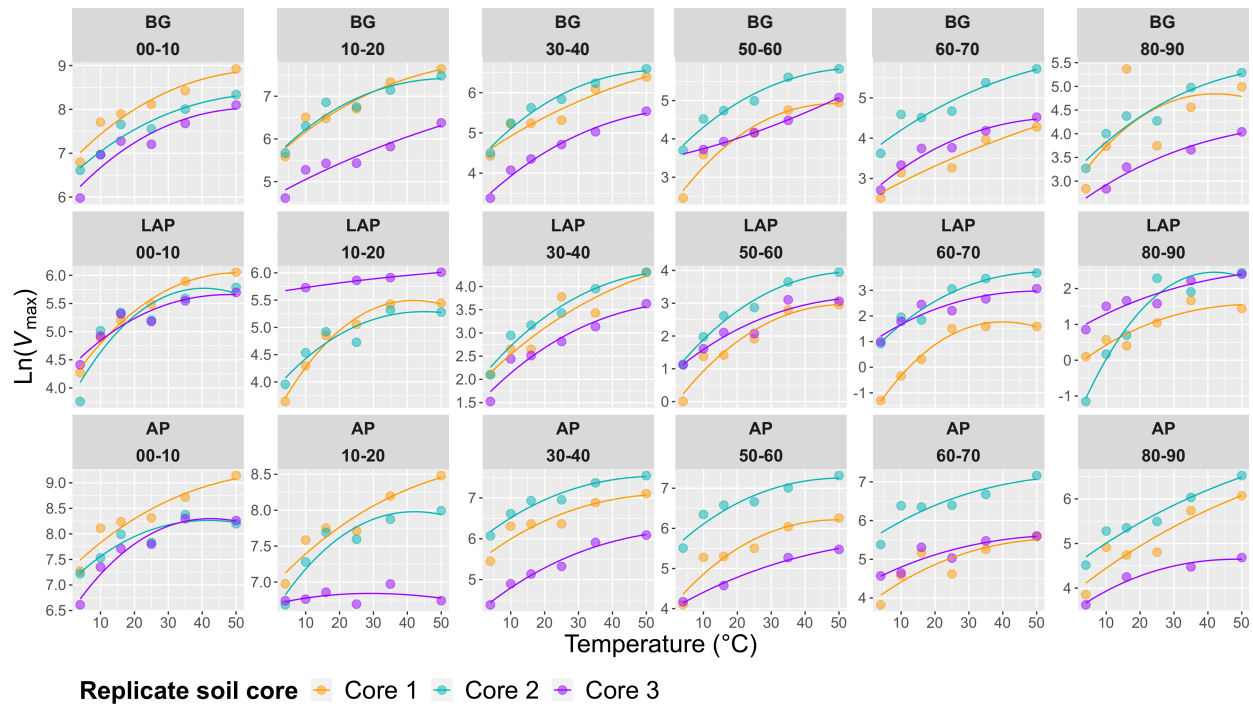

**Figure 7**

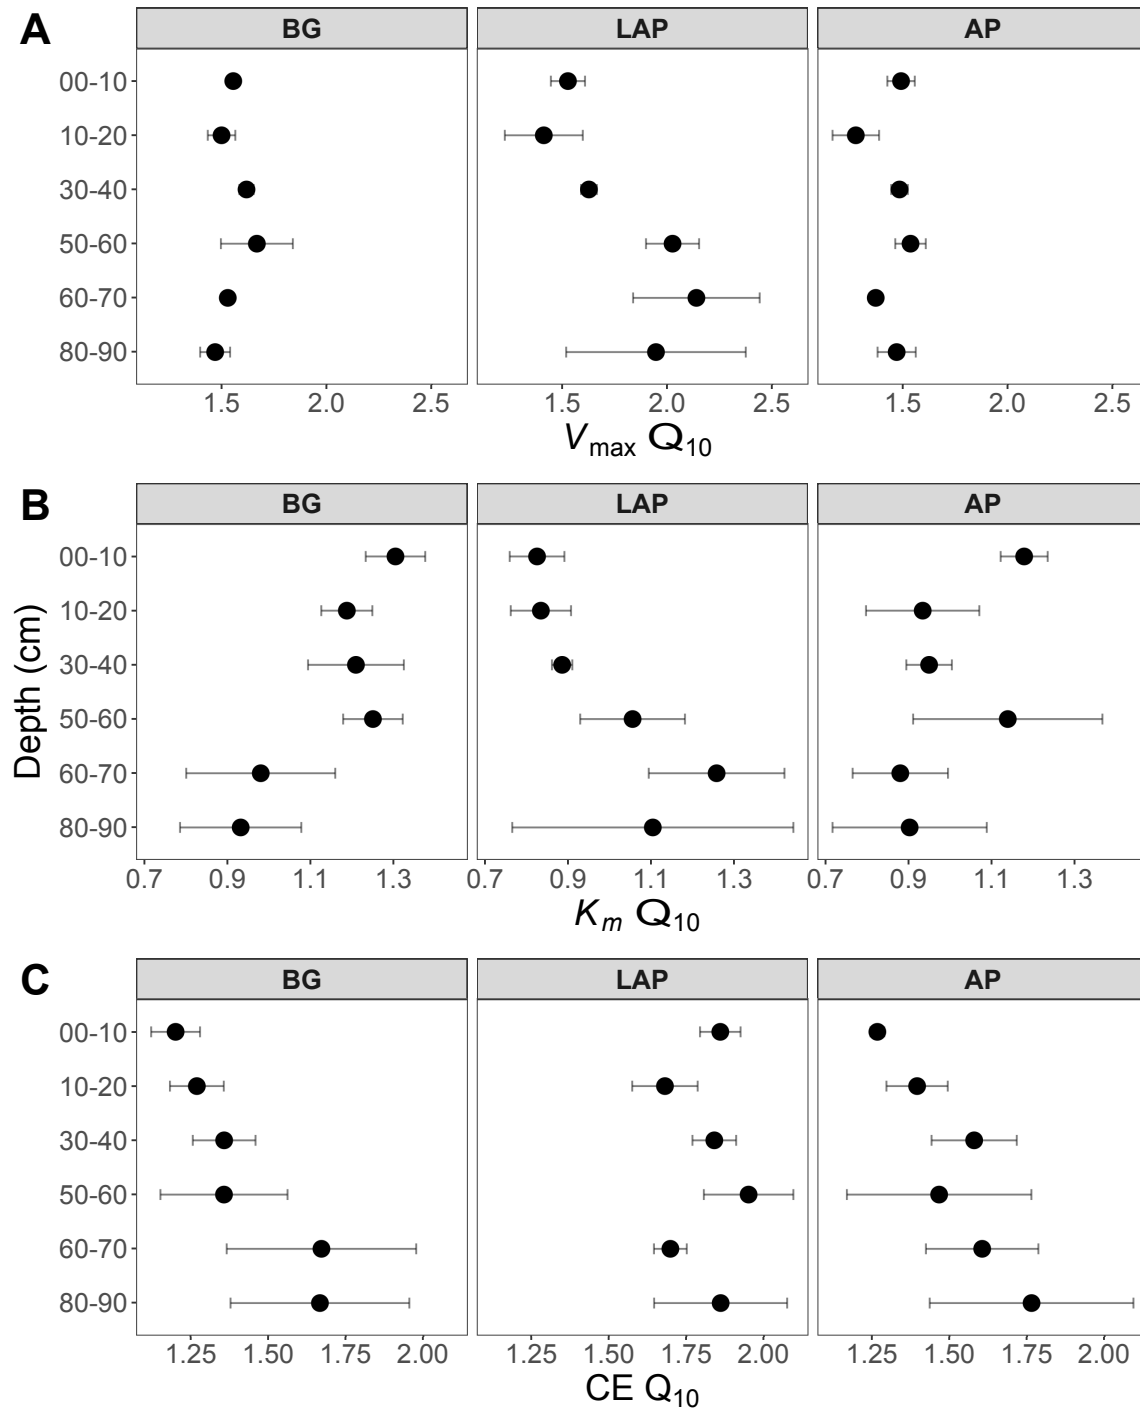

**Figure 8**

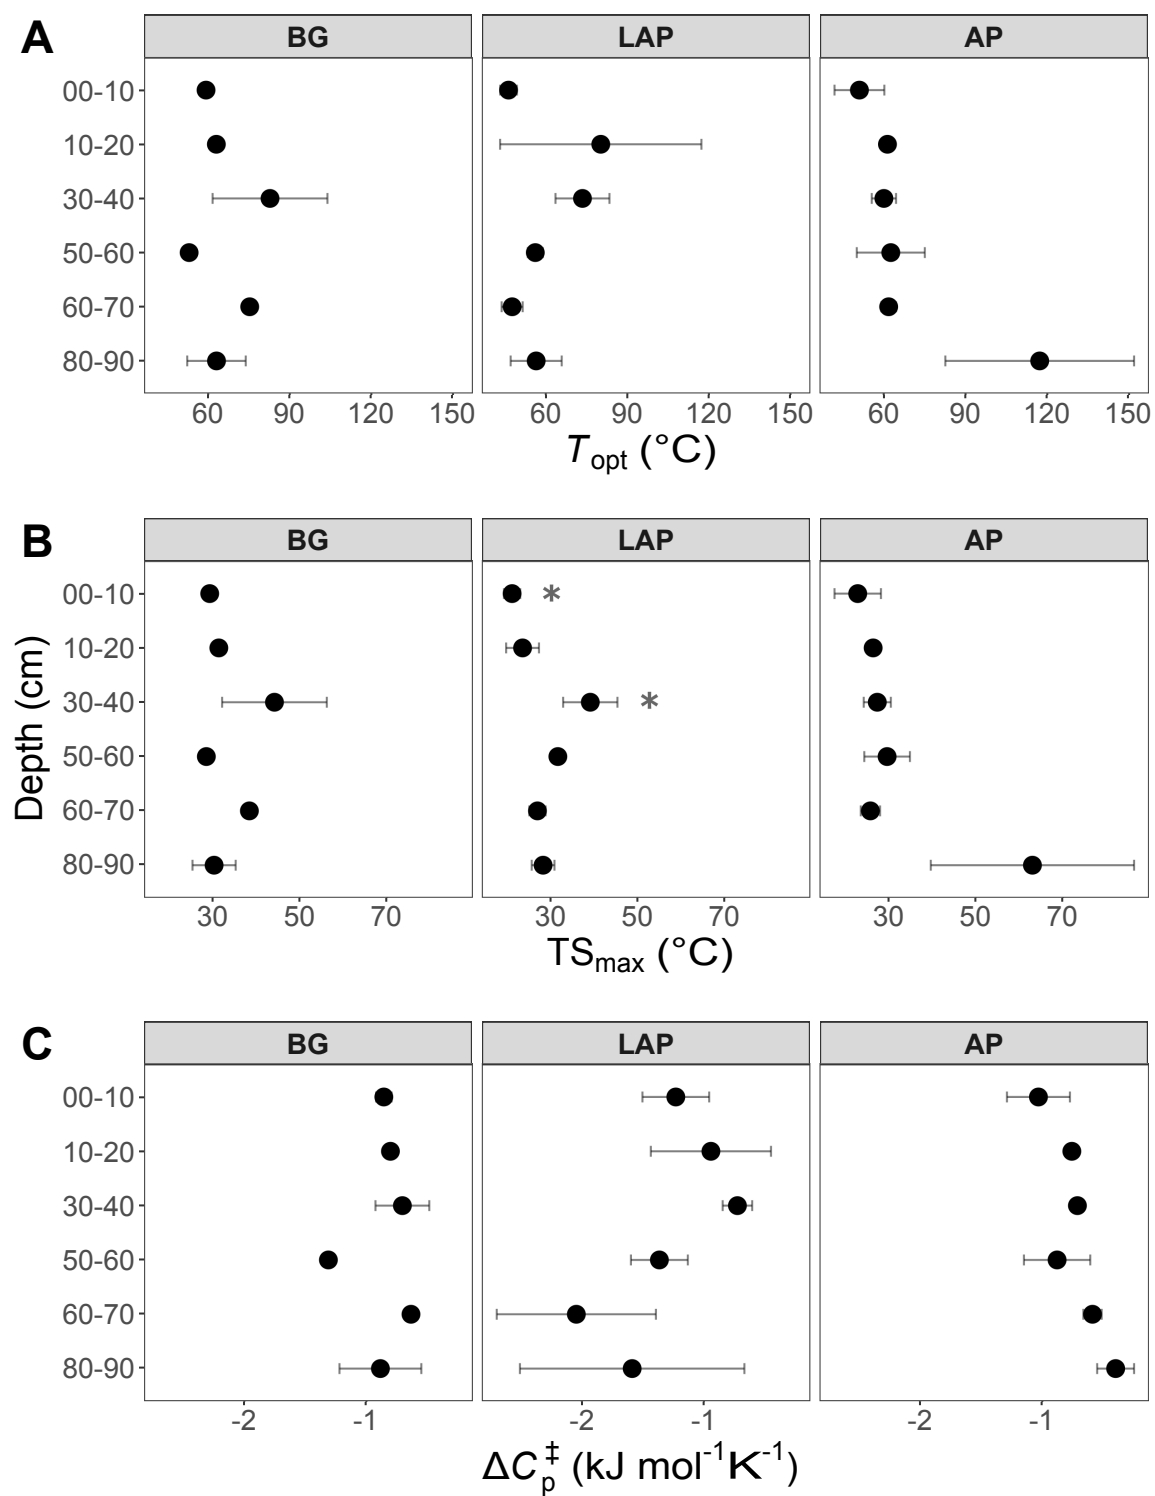

Source: http://biorxiv.org/content/10.1101/2021.07.02.450965v1.full.pdf
